# Supplementary material
Source: PubMed Central journal article supplement (PMC4151231)
Supplement: JCI64628sd.pdf [file JCI64628sd.pdf]

## SUPPLEMENTAL MATERIAL

### 1. Materials and methods

#### *Materials*

AM251, AM630, anandamide (AEA), and (-)-cannabidiol (CBD) were purchased from Cayman Chemical Company; AMG 9810,  $\gamma$ -irradiated lipopolysaccharides from *Escherichia coli* 026:B6 (LPS), lipoteichoic acid from *Staphylococcus aureus* (LTA), arachidonic acid (AA), capsazepine (CPZ), cyclosporine A (CSA), GF109203X (GF), GSK1016790A (GSK), H89, linoleic acid (LA), ruthenium red (RR) and testosterone (T) were obtained from Sigma-Aldrich. HC067047 (HC) was purchased from Maybridge Ltd., ZM241385 (ZM) from Tocris Bioscience, and Gö6976 (Gö) and wortmannin (WM) from Calbiochem. AA, AEA, AM251, CBD and LA were dissolved in absolute ethanol (Sigma-Aldrich), while the solvent for AM630, AMG 9810, CBD (only in hSOC experiments), CPZ, CSA, GF, Gö, GSK, HC, RR, T, WM and ZM was DMSO (Sigma-Aldrich). LPS, LTA and H89 were dissolved in filtered distilled water.

#### *Cell culturing*

Human immortalized SZ95 sebocytes, originated from human facial sebaceous glands (19), were cultured in Sebomed<sup>®</sup> Basal Medium (Biochrom) supplemented with 10% fetal bovine serum (LifeTechnologies), 1 mM  $\text{CaCl}_2$ , 5 ng/ml human epidermal growth factor (Sigma-Aldrich), 50 IU/ml penicillin and 50  $\mu\text{g/ml}$  streptomycin (both from Teva). The final calcium concentration of the medium was approximately 1.25 mM ("high- $\text{Ca}^{2+}$  medium"). The "low- $\text{Ca}^{2+}$  Sebomed medium" was prepared to set the  $\text{Ca}^{2+}$  concentration to 0.25 mM. The medium was changed every other day, and cells were sub-cultured at 60-70% confluence.

#### *Determination of intracellular lipids*

For semi-quantitative detection of sebaceous lipids, cells were cultured on glass coverslips, and treated with various compounds for 24 hrs. Cells were then washed in phosphate-buffered saline (PBS; 115 mM NaCl, 20 mM  $\text{Na}_2\text{HPO}_4$ , pH 7.4; all from Sigma-Aldrich), fixed in 4% paraformaldehyde/PBS (Sigma-Aldrich), washed again twice in PBS and once in 60% isopropanol, and stained in freshly prepared Oil Red O solution (in 60% isopropanol) (Sigma-Aldrich) for 20 minutes at 37°C. Nuclei were counterstained with Mayer's hematoxylin (Sigma-Aldrich) for 20 s and coverslips were finally mounted in mounting medium (DAKO).

For quantitative measurement of lipid content, cells (densities: 2,000 cells/well [6-day treatments] or 20,000 cells/well [24-48-hr treatments]) were cultured in 96-well black-

well/clear-bottom plates (Greiner Bio-One) in quadruplicates, and were treated with compounds as indicated. Subsequently, supernatants were discarded, cells were washed twice with PBS, and 100  $\mu$ l of a 1  $\mu$ g/ml Nile Red (Sigma-Aldrich) solution in PBS was added to each well. The plates were then incubated at 37°C for 20 min, and fluorescence was measured on a Molecular Devices FlexStation<sup>384</sup> II or FlexStation 3 **FLuorescence Image MicroPlate Reader (FLIPR; Molecular Devices)**. Results are expressed as percentages of the relative fluorescence units (RF) in comparison with the controls using 485 nm excitation and 565 nm emission wavelengths for neutral lipids, and 540 nm excitation and 620 nm emission wavelengths for polar lipids.

### *Investigation of the lipidome*

#### Chemicals

Eluents and extraction solvents were of HPLC/MS grade and were purchased from Merck. Ammonium formate (HCOONH<sub>4</sub>) was of HPLC/MS grade and was purchased in granular form from Fluka. The authentic triglycerides (TG) 1-palmitoyl-2-oleoyl-3-lineoleoyl-rac-glycerol and 1,3-dipalmitoyl-2-oleoylglycerol were purchased from Cayman Chemical Company and Sigma-Aldrich, respectively. The authentic diacylglyceride (DG) 1,2-dioleoyl-sn-glycerol was purchased from Cayman. The authentic free fatty acids (FFA) linoleic, palmitoleic, palmitic, stearic, oleic, linolenic, and arachidonic acids, as well as the standard wax ester (WE) lauryl palmitoleate, and the standard squalene (SQ), free cholesterol (CH) and cholesteryl esters (CE) oleate, linoleate, and arachidonate were purchased from Sigma-Aldrich. Dodecanoyl sphingomyelin (12:0 SM) was purchased from Avanti Polar Lipids, and used as the internal standard.

#### Sample extraction

SZ95 sebocytes were harvested by trypsinization and counted. Before extraction, cell pellets were suspended in 500  $\mu$ l of 5 mM ammonium formate. Extraction of neutral lipids was performed as previously described with slight modifications (78). 500  $\mu$ l of abs. EtOH and 500 pM of the internal standard 12:0 SM were added to the cell suspension and mixed thoroughly. Liquid-liquid extraction was performed twice with 3 ml EtOAc. The unified layers of EtOAc were evaporated under a gentle stream of nitrogen. The total lipid extract was dissolved in Ac<sub>2</sub>O/MeOH/iPrOH 40/40/20 before injection.

#### LC-MS analysis of lipid extracts

The lipid extracts were analyzed as previously reported (78). Shortly, the rapid resolution reversed phase HPLC (RR-RP-HPLC) separation was performed with Zorbax SB-C8 stationary phase. Lipids were eluted with a binary gradient of (A) 5 mM ammonium formate in MilliQ water (18.2  $\Omega$ ) and (B) MeOH/iPrOH 95/5. The eluent outlet was connected to a G6220A series time of flight mass spectrometer (ToF-MS, Agilent Technologies) by means of electrospray ionization (ESI) interface

operating in the positive and negative ion modes. Neutral lipids and free fatty acids were detected in the positive and the negative ion mode, respectively. Scan mode ToF mass spectra were acquired in the positive and negative ion mode by using the ToF at 10,000 mass resolving power for scans over the range from  $m/z$  100 to  $m/z$  1000. MS scans were processed using the Mass Hunter software (B.01.03 version). The resulting data were converted to mass centroid from which the accurate  $m/z$  value was measured. Accurate mass measurements and isotopic patterns were the basis to retrieve the elemental composition and unsaturation degree of detected compounds. Identity of lipid species was established with the previously reported methodology (78).

#### Data extraction and statistical analysis

Following the RR-RP-HPLC separation, retention times of neutral and acidic lipids that were expected to be present in the SZ95 sebocyte lipid extracts were consistent with those of authentic standards and with our previous findings. Peak areas of the individual lipids detected in the positive and negative ion modes were obtained from extracted ion chromatograms (EIC) derived by extraction of the  $m/z$  values of their pseudomolecular ion (78). To determine the relative abundance of neutral lipids the peak area of individual lipid species detected in the positive ion mode was normalized by the cell number and the peak area of the internal standard 12:0 SM in the EIC obtained by extraction of the  $m/z$  647.5128 corresponding to the  $[M+H]^+$  ion C<sub>35</sub>H<sub>72</sub>N<sub>2</sub>O<sub>6</sub>P. To determine the relative abundance of FFA, which were detected in the negative ion mode, their peak area was normalized by the cell number and the peak area of the internal standard 12:0 SM in the EIC obtained by extraction of the  $m/z$  691.5032 corresponding to the  $[M+HCOO]^-$  ion C<sub>36</sub>H<sub>72</sub>N<sub>2</sub>O<sub>8</sub>P of the internal standard. Total relative abundance of lipid groups, i.e. TG, DG, WE, CE, and FFA was obtained by summing the relative abundance of individual lipids belonging to the same lipid class.

#### *Determination of cellular viability*

The viability of the cells was determined by measuring the conversion of the tetrazolium salt MTT (Sigma-Aldrich) to formazan by mitochondrial dehydrogenases. Cells were plated in 96-well plates (densities: 2,000 cells/well [6-day treatments] or 20,000 cells/well [2-day treatments]) in quadruplicates, and were cultured for 2 or 6 days. Cells were then incubated with 0.5 mg/ml MTT for 2 hrs, and concentration of formazan crystals (as an indicator of number of viable cells) was determined colorimetrically as described previously (10, 12). Results were expressed as percentage of vehicle controls regarded as 100%.

#### *Determination of apoptosis*

A decrease in the mitochondrial membrane potential is one of the earliest markers of apoptosis. Therefore, to assess the process, mitochondrial membrane potential of SZ95 sebocytes was determined using a MitoProbe™ DiIC<sub>1</sub>(5) Assay Kit (Life Technologies). Cells (20,000 cells/well) were cultured in 96-well black-well/clear-bottom plates (Greiner Bio One) in quadruplicates and were treated with various compounds for 24 hrs. After removal of supernatants, cells were incubated for 30 minutes with DiIC<sub>1</sub>(5) working solution (50 µl/well), then washed with PBS, and the fluorescence of DiIC<sub>1</sub>(5) was measured at 630 nm excitation and 670 nm emission wavelengths using the above FLIPRs (Molecular Devices). RF values were expressed as percentage of vehicle controls regarded as 100%.

#### *Determination of necrosis*

Necrotic processes were determined by SYTOX Green staining (Life Technologies). The dye is able to penetrate (and then bind to the nucleic acids) only to necrotic cells with ruptured plasma membranes, whereas healthy cells with intact surface membranes show negligible SYTOX Green staining. Cells were cultured in 96-well black-well/clear-bottom plates (Greiner Bio One), and treated with CBD for up to 24 hrs. Supernatants were then discarded, and the cells were incubated for 30 minutes with 1 µM SYTOX Green dye. Following incubation, cells were washed with PBS, the culture medium was replaced, and fluorescence of SYTOX Green was measured at 490 nm excitation and 520 nm emission wavelengths using FLIPR (Molecular Devices).

#### *Determination of cellular proliferation*

The degree of cellular growth (reflecting proliferation) was determined by measuring the DNA content of cells using CyQUANT Cell Proliferation Assay Kit (Life Technologies). SZ95 sebocytes (5,000 cells per well) were cultured in 96-well black-well/clear-bottom plates (Greiner Bio-One) and were treated as indicated for 24, 48 and 72 hrs. Supernatants were then removed by blotting on paper towels, and the plates were subsequently frozen at -80°C. The plates were then thawed at room temperature, and 200 µl of CyQUANT dye/cell lysis buffer mixture was added to each well. After 5 minutes of incubation, fluorescence was measured at 490 nm excitation and 520 nm emission wavelengths using FLIPR (Molecular Devices).

#### *RNA isolation, reverse transcription, quantitative “real-time” PCR (Q-PCR)*

Q-PCR was performed on an ABI Prism 7000 sequence detection system (Applied Biosystems) or Stratagene Mx3005P QPCR System (Agilent Technologies) using the 5' nuclease assay. Total RNA was isolated using TRIzol (Life Technologies), DNase

treatment was performed according to the manufacturer's protocol, and then 1 µg of total RNA were reverse-transcribed into cDNA by using 15 IU of AMV reverse transcriptase (Promega) and 0.025 µg/µl random primers (Promega). PCR amplification was performed by using the TaqMan primers and probes (assay ID-s: Hs00189038\_m1 for cathelicidin, Hs00174097\_m1 for *IL1B*, Hs00985639\_m1 for *IL6*, Hs01032443\_m1 for Ki67 (*MKI67*), Hs00942766\_s1 for *NRIP1*, Hs01082394\_m1 for *TRIB3*, Hs00261256\_m1 for *ARHGAP9*, Hs00169123\_m1 for A2a receptor (*ADORA2A*), Hs00174128\_m1 for *TNFA*, Hs00218912\_m1 for *TRPV1*, Hs00275032\_m1 for *TRPV2*, Hs00222101\_m1 for *TRPV4*, Hs00175798\_m1 for *TRPA1* and Hs00375481\_m1 for *TRPM8*) and the TaqMan universal PCR master mix protocol (Applied Biosystems). As internal controls, transcripts of glyceraldehyde 3-phosphate dehydrogenase (*GAPDH*), peptidyl-prolyl isomerase A (cyclophilin A; *PPIA*), and 18S ribosomal RNA (*18S*) were determined (assay ID-s: Hs99999905\_m1, Hs 99999904\_m1, and Hs99999901\_s1, respectively). The amount of the transcripts was normalized to those of the relevant housekeeping gene using the  $\Delta$ CT method. When indicated, the results were then normalized to the expression of the vehicle control ( $\Delta\Delta$ CT method).

### *Immunocytochemistry*

SZ95 sebocytes, seeded and cultured on sterile coverslips in 24-well plates, were fixed in ice-cold acetone for 5 min and then permeabilized by 0.1% Triton-X-100 (Sigma-Aldrich) in PBS for 10 min. After washing in PBS and blocking in 1% BSA (Sigma-Aldrich) in PBS for 30 min, cells were incubated with the TRPV1 (Sigma-Aldrich), TRPV2, TRPA1, TRPM8, A2a (AbCam) and TRPV4 (Alomone Labs) specific primary antibodies (all produced in rabbit; dilution 1:500 in blocking solution; overnight incubation at 4°C). For fluorescence staining, slides were then incubated with Alexa-Fluor®-488-conjugated rabbit IgG Fc segment-specific secondary antibodies (developed in goat; Life Technologies) for 60 min (dilution 1:200), and the nuclei of cells were visualized using DAPI (Vector Laboratories). Cells were examined on a Nikon Eclipse E600 fluorescent microscope (Nikon). As negative controls, the appropriate primary antibodies were omitted from the procedure.

### *Western blotting*

Cells were harvested in lysis buffer (20 mM Tris-HCl, pH 7.4, 5 mM EGTA, 1 mM 4-(2-aminoethyl)benzensulfonyl fluoride, protease inhibitor cocktail diluted 1:100, all from Sigma-Aldrich) and the protein content was measured by a modified BCA protein assay (Pierce). The samples were then subjected to sodium dodecyl sulfate-polyacrylamide gel electrophoresis (7.5% gels were loaded with equal [20-60 µg] amount of protein per lane), transferred to BioBond nitrocellulose membranes (Whatman), and then probed with rabbit-anti-human NRIP1 and TRIB3 (both from

Novus Biologicals; 1:200 dilution in 5% milk containing PBS), rabbit-anti-human MAPK ERK1/2, mouse-anti-human P-ERK1/2 (both from Santa Cruz; 1:1500 dilution in both cases in 5% milk containing PBS), mouse-anti-human P-IkB $\alpha$  (Cell Signaling; 1:1000 dilution in 5% milk containing PBS), rabbit-anti-P-P65 (Novus Biologicals; 1:1000 dilution in 5% milk containing PBS) or the above primary anti-TRP channel and anti-A2a receptor specific antibodies (all of them were applied in 1:200 in 5% milk containing PBS). As secondary antibodies, horseradish peroxidase-conjugated rabbit or mouse IgG Fc segment-specific antibodies (developed in goat and sheep, respectively, 1:1000, Bio-Rad) were used, and the immunoreactive bands were visualized by a SuperSignal® West Pico Chemiluminescent Substrate enhanced chemiluminescence kit (Pierce) using a KODAK Gel Logic 1500 Imaging System (Eastman Kodak Company). To assess equal loading, when indicated, membranes were re-probed with anti- $\beta$ -actin antibodies and visualized as described above.

Semiquantitative densitometric analysis of the signals was performed by using Image J software (NIH).

### *Full-thickness human skin organ culture and sample preparations*

#### Sample preparation and organ culture

4 mm biopsies of intact human scalp and arm skin samples obtained from 4 female individuals (average age: 56 years old) were punched out using a biopsy punch (pfm medical). These biopsies were maintained in serum-free William's E medium (Biochrom) supplemented with 2 mM L-glutamine (Life Technologies), 10 ng/ml hydrocortisone (Sigma-Aldrich), 10  $\mu$ g/ml insulin (Sigma-Aldrich), and 1% antibiotic/antimycotic mixture (PAA Laboratories GmbH). The control group received vehicle alone. The skin biopsies were left to float in the medium, with the epidermis up at the air/liquid interface and the dermis/subcutis down (20). The cultures were incubated at 37°C in a gassed incubator with 95% air and 5% CO<sub>2</sub> at 37°C.

#### Oil Red O staining

After the organ culture, skin samples were embedded in Cryomatrix (Thermo Shandon Limited) and frozen in liquid nitrogen. Cryo-sections of 6  $\mu$ m thickness were processed for Oil red O histochemistry. After washing in distilled water, cryo-sections were incubated in 60% isopropanol (Sigma-Aldrich), and stained in freshly prepared Oil Red O solution (0.3% in isopropanol; Sigma-Aldrich). Nuclei were counterstained with hematoxylin (Carl Roth GmbH) and the sections were mounted in aqueous mounting medium (DAKO). Images were analyzed by Image J image analysis software (NIH).

#### MKI67 staining

To assess proliferation in human skin organ cultures, a MKI67 staining method was employed. Briefly, after CBD treatment, cryostat sections were labeled with a mouse anti-MKI67 antiserum (1:20, DAKO). MKI67-positive cells were visualized by using a rhodamine-conjugated goat anti-mouse secondary antibody (1:200, Jackson ImmunoResearch). Sections were then counterstained with DAPI (4',6-diamidino-2-phenylindole; Vector Laboratories). The analysis for cell counting on 2 sections per group was performed using a fluorescence microscope BZ-8100 (Biozero, Keyence). The distance between two analyzed sections was more than 50  $\mu$ m.

### *RNA interference (RNAi)*

RNAi was performed according to our optimized protocols (10, 38). In brief, SZ95 sebocytes at 50-70% confluence were transfected with specific Stealth RNAi oligonucleotides (40 nM) against NRIP1 (ID-s: HSS112045 ("siNRIP1a") and HSS112046 ("siNRIP1b")), TRIB3 (ID-s: HSS184051 ("siTRIB3a") and HSS184052 ("siTRIB3b")), TRPV1 (ID-s: HSS111304 ("sV1a") and HSS111306 ("siV1b")), TRPV2 (ID-s: HSS122144 ("siV2a") and HSS122145 ("siV2b")) and TRPV4 (ID-s: HSS126973 ("siV4a") and HSS126974 ("siV4b")) using Lipofectamine 2000 (all from Life Technologies). For controls, RNAi Negative Control Duplexes (Scrambled RNAi "medium") were applied. The efficacy of RNAi-driven "knock-down" was evaluated daily by Western blotting and by Q-PCR.

### *Microarray analysis*

Gene expression analysis of three independent sets of control and CBD-treated SZ95 sebocytes (10  $\mu$ M CBD for 24 hrs) was performed by using Human Whole Genome Oligo Microarray® (44K) (Agilent Technologies). Total RNA was isolated using TRIzol (LifeTechnologies) according to the manufacturer's protocol, and the isolated RNA was quality-checked by Agilent 2100 Bioanalyzer platform (Agilent Technologies) and Nanodrop-1000 Spectrophotometer (NanoDrop/Thermo Scientific). Alterations in the gene expression were regarded as significant if (i) there were at least two-fold changes in the corresponding levels; (ii) the changes were equi-directional in all cases; and (iii) global, corrected *P* value was less than 0.05. Evaluation, Gene Set Enrichment Analysis (GSEA) and Biological Networks Gene Ontology analysis (BiNGO) of the results was performed by Abiomics Ltd (<http://www.abiomics.eu>).

Data have been deposited in NCBI's Gene Expression Omnibus (79) and are accessible through GEO Series accession number GSE57571 (<http://www.ncbi.nlm.nih.gov/geo/query/acc.cgi?acc=GSE57571>).

### *Determination of the intracellular 3'-5'-cyclic adenosine monophosphate concentration (cAMP ELISA)*

SZ95 sebocytes were treated for 1 hour with vehicle or CBD (10  $\mu$ M). Cells were then lysed (cell density:  $10^7$  cells/ml), and cell lysates were assayed immediately according to the manufacturer's protocol, using Parameter Cyclic AMP Assay (R&D Systems). Evaluation of the data was performed by using "Four Parameter Logistic Curve" online data analysis tool of MyAssays Ltd. (<http://www.myassays.com/four-parameter-logistic-curve.assay>).

### *Patch-clamp recording*

Whole cell patch clamp measurements were made by using an Axopatch 200A amplifier and Clampex 10.0 software (Molecular Devices) or an EPC-10 amplifier and Patchmaster software (HEKA Elektronik). To record CBD evoked transmembrane currents, experiments were performed in normal Ringer solution (in mM: NaCl, 140; KCl, 5; glucose, 10; HEPES, 10; CaCl<sub>2</sub>, 2; MgCl<sub>2</sub>, 1; and sodium-pyruvate, 1; pH 7.2) and patch pipettes were filled with a solution containing (in mM): K-gluconate, 120; NaCl, 5; 4-(2-hydroxyethyl)-1-piperazineethanesulfonic acid (HEPES), 10; EGTA, 2; CaCl<sub>2</sub>, 0.1; Mg-ATP, 5; Na<sub>3</sub>-GTP, 0.3; Na<sub>2</sub>-phosphocreatinine, 10; pH 7.3. To record TRPV4 current, the bath solution consisted of 150 mM NaCl, 6 mM CsCl, 5 mM CaCl<sub>2</sub>, 1 mM MgCl<sub>2</sub>, 10 mM HEPES and 10 mM glucose buffered to pH 7.4 (NaOH), whereas the pipette solution consisted of 100 mM aspartic acid, 20 mM CsCl, 1 mM MgCl<sub>2</sub>, 0.08 mM CaCl<sub>2</sub>, 4 mM Na<sub>2</sub>ATP, 10 mM BAPTA, 10 mM HEPES and pH was set to 7.2 using CsOH resulted in ca. 100 mM CsAsp in the final pipette solution. The holding potential was 0 mV and cells were ramped every 2 s from -120 to +100 mV over the course of 400 ms.

### *Fluorescent Ca<sup>2+</sup>-imaging*

Fluorescent Ca<sup>2+</sup>-imaging was performed according to our previously optimized protocol (80). In brief, SZ95 sebocytes were seeded in 96-well black-well/clear-bottom plates (Greiner Bio-One) at a density of 20,000 cells per well. Cells were washed two times with 1% bovine serum albumin (Sigma-Aldrich) and 2.5 mM Probenecid (Sigma-Aldrich) containing Hank's solution (136.8 mM NaCl, 5.4 mM KCl, 0.34 mM Na<sub>2</sub>HPO<sub>4</sub>, 0.44 mM KH<sub>2</sub>PO<sub>4</sub>, 0.81 mM MgSO<sub>4</sub>, 1.26 mM CaCl<sub>2</sub>, 5.56 mM glucose, 4.17 mM NaHCO<sub>3</sub>, pH 7.2, all from Sigma-Aldrich). The cells were then incubated with 1  $\mu$ M Fluo-4 AM (Life Technologies) containing Hank's solution (100  $\mu$ l/well) at 37°C for 30 min, and were then washed three times with Hank's solution (100  $\mu$ l/well; in the case of the "low Ca<sup>2+</sup> Hank" the CaCl<sub>2</sub> content was supplemented by equimolar glucose). The plates were then placed in a FLIPR (Molecular Devices), and changes in [Ca<sup>2+</sup>]<sub>IC</sub> (reflected by changes fluorescence; excitation: 490 nm;

emission: 520 nm) induced by various concentrations of the compounds were recorded in each well. Experiments were performed in triplicates and the averaged data (as well as SEM) were used in the calculations.

#### *Statistical analysis*

Data were analyzed by IBM SPSS Statistics 19 (SPSS Inc.) software, using Student's two tailed two samples *t*-test (paired comparisons) or one-way ANOVA with Bonferroni's and Dunnett's post hoc probes (multiple comparisons) and  $P < 0.05$  values were regarded as significant differences. Homogeneity of variances were analyzed by Levene's test. If Levene's test indicated inhomogeneity of variances, Games-Howel test was used instead of Bonferroni. Graphs were plotted by using Origin Pro Plus 6.0 software (Microcal).

#### *Study approval*

This study was approved by the Institutional Research Ethics Committee (University of Lübeck) and adhered to the Declaration of Helsinki Principle guidelines. Study subjects provided informed consent prior to their participation.

## 2. Supplemental Tables

**Supplemental Table 1.** List of genes that were significantly down-regulated (3 independent treatments, at least 2-fold equi-directional changes in all cases,  $P < 0.05$ ) by CBD treatment of human SZ95 sebocytes

| Gene Name              | Description                                                                                                                       | Average Fold Change | Note                                                                                                                    |
|------------------------|-----------------------------------------------------------------------------------------------------------------------------------|---------------------|-------------------------------------------------------------------------------------------------------------------------|
| <b>MID1</b>            | Homo sapiens midline 1 (Opitz/BBB syndrome) (MID1), transcript variant 3, mRNA [NM_033290]                                        | 0.144583754         |                                                                                                                         |
| <b>SLC39A10</b>        | Homo sapiens solute carrier family 39 (zinc transporter), member 10 (SLC39A10), mRNA [NM_020342]                                  | 0.179378308         | Same effect was shown in BV-2 microglia cells; SLC39A10 is involved in $Zn^{2+}$ -efflux (81).                          |
| <b>ENST00000380787</b> | Unknown                                                                                                                           | 0.218302567         |                                                                                                                         |
| <b>NAT1</b>            | Homo sapiens N-acetyltransferase 1 (arylamine N-acetyltransferase) (NAT1), mRNA [NM_000662]                                       | 0.220518435         |                                                                                                                         |
| <b>CD24</b>            | Homo sapiens CD24 signal transducer mRNA, complete cds and 3' region. [L33930]                                                    | 0.244703822         |                                                                                                                         |
| <b>A_32_P82293</b>     | Unknown                                                                                                                           | 0.276372603         |                                                                                                                         |
| <b>ARHGAP24</b>        | Homo sapiens cDNA FLJ27066 fis, clone SPL01327. [AK130576]                                                                        | 0.286928365         |                                                                                                                         |
| <b>DAAM1</b>           | Homo sapiens disheveled associated activator of morphogenesis 1 (DAAM1), mRNA [NM_014992]                                         | 0.288870651         | It is thought to function as a scaffolding protein for the Wnt-induced assembly of a disheveled (Dvl)-Rho complex (82). |
| <b>OPN3</b>            | Homo sapiens opsin 3 (encephalopsin, panopsin) (OPN3), transcript variant 1, mRNA [NM_014322]                                     | 0.294213681         |                                                                                                                         |
| <b>LAMB1</b>           | Homo sapiens laminin, beta 1 (LAMB1), mRNA [NM_002291]                                                                            | 0.295427431         |                                                                                                                         |
| <b>NTN4</b>            | Homo sapiens netrin 4 (NTN4), mRNA [NM_021229]                                                                                    | 0.297136326         | It promotes cellular proliferation (83).                                                                                |
| <b>BF508144</b>        | UI-H-BI4-apz-e-08-0-UI.s1 NCI_CGAP_Sub8 Homo sapiens cDNA clone IMAGE:3089007 3', mRNA sequence [BF508144]                        | 0.298223395         |                                                                                                                         |
| <b>PRSS23</b>          | Homo sapiens protease, serine, 23 (PRSS23), mRNA [NM_007173]                                                                      | 0.301106646         |                                                                                                                         |
| <b>STEAP4</b>          | Homo sapiens STEAP family member 4 (STEAP4), mRNA [NM_024636]                                                                     | 0.303239595         | It is thought to be involved in adipocyte differentiation (84).                                                         |
| <b>SPTLC2L</b>         | Homo sapiens cDNA FLJ90790 fis, clone THYRO1001529, moderately similar to Serine palmitoyltransferase 2 (EC 2.3.1.50). [AK075271] | 0.304280871         |                                                                                                                         |
| <b>FOXA1</b>           | Homo sapiens forkhead box A1 (FOXA1), mRNA [NM_004496]                                                                            | 0.304794447         | It is a mesenchymal differentiation marker (85).                                                                        |

|                        |                                                                                                                                     |             |                                                                                                     |
|------------------------|-------------------------------------------------------------------------------------------------------------------------------------|-------------|-----------------------------------------------------------------------------------------------------|
| <b>LXN</b>             | Homo sapiens latexin (LXN), mRNA [NM_020169]                                                                                        | 0.309134992 |                                                                                                     |
| <b>NRIP1</b>           | Homo sapiens nuclear receptor interacting protein 1 (NRIP1), mRNA [NM_003489]                                                       | 0.309212846 | Essential for triglyceride storage in adipose tissue (46).                                          |
| <b>TLR1</b>            | Homo sapiens toll-like receptor 1 (TLR1), mRNA [NM_003263]                                                                          | 0.312672783 | Role in innate immunity (86).                                                                       |
| <b>ENST00000353442</b> | Unknown                                                                                                                             | 0.314827882 |                                                                                                     |
| <b>MAP4K3</b>          | Homo sapiens mitogen-activated protein kinase kinase kinase 3 (MAP4K3), mRNA [NM_003618]                                            | 0.325163457 | It plays a role in the activation of mTORC1 (87), which is thought to have "pro-acne" effects (43). |
| <b>TRAM1</b>           | Homo sapiens translocation associated membrane protein 1 (TRAM1), mRNA [NM_014294]                                                  | 0.327653171 |                                                                                                     |
| <b>THC2386010</b>      | Unknown                                                                                                                             | 0.331284758 |                                                                                                     |
| <b>TPMT</b>            | Homo sapiens thiopurine S-methyltransferase (TPMT), mRNA [NM_000367]                                                                | 0.332831935 |                                                                                                     |
| <b>LMO7</b>            | Homo sapiens LIM domain 7 (LMO7), mRNA [NM_005358]                                                                                  | 0.334474202 |                                                                                                     |
| <b>THC2367825</b>      | Q9N3X9 (Q9N3X9) Collagen protein 115, partial (5%) [THC2367825]                                                                     | 0.335682775 |                                                                                                     |
| <b>ENST00000367385</b> | Homo sapiens mRNA; cDNA DKFZp586G2222 (from clone DKFZp586G2222). [AL080111]                                                        | 0.336935039 |                                                                                                     |
| <b>THC2279364</b>      | ALU8_HUMAN (P39195) Alu subfamily SX sequence contamination warning entry, partial (4%) [THC2279364]                                | 0.337174074 |                                                                                                     |
| <b>AV698092</b>        | AV698092 GKC Homo sapiens cDNA clone GKCGUA09 5', mRNA sequence [AV698092]                                                          | 0.344919878 |                                                                                                     |
| <b>AF086216</b>        | Homo sapiens full length insert cDNA clone ZC65B11. [AF086216]                                                                      | 0.344946688 |                                                                                                     |
| <b>ZNF702</b>          | Homo sapiens cDNA FLJ12985 fis, clone NT2RP3000050, moderately similar to ZINC FINGER PROTEIN 91. [AK023047]                        | 0.349667263 |                                                                                                     |
| <b>EFEMP1</b>          | Homo sapiens EGF-containing fibulin-like extracellular matrix protein 1 (EFEMP1), transcript variant 1, mRNA [NM_004105]            | 0.350370379 |                                                                                                     |
| <b>LOC649791</b>       | PREDICTED: Homo sapiens similar to general transcription factor II, i isoform 1, transcript variant 4 (LOC649791), mRNA [XM_943120] | 0.351190156 |                                                                                                     |
| <b>KIAA0101</b>        | Homo sapiens KIAA0101 (KIAA0101), transcript variant 1, mRNA [NM_014736]                                                            | 0.353153053 |                                                                                                     |
| <b>POT1</b>            | Homo sapiens POT1 protection of telomeres 1 homolog (S. pombe) (POT1), mRNA [NM_015450]                                             | 0.35484116  |                                                                                                     |
| <b>AF113674</b>        | Homo sapiens clone FLB1727 PRO0398 mRNA, complete cds. [AF113674]                                                                   | 0.359119921 |                                                                                                     |

|                        |                                                                                                                    |             |                                                   |
|------------------------|--------------------------------------------------------------------------------------------------------------------|-------------|---------------------------------------------------|
| <b>RP4-747L4.3</b>     | Homo sapiens hypothetical protein MGC12538, mRNA (cDNA clone MGC:12538 IMAGE:3839075), complete cds. [BC007072]    | 0.359262384 |                                                   |
| <b>KLF5</b>            | Homo sapiens Kruppel-like factor 5 (intestinal) (KLF5), mRNA [NM_001730]                                           | 0.360155512 | It is pro-proliferative in epithelial cells (88). |
| <b>ENST00000297145</b> | Homo sapiens PNAS-12 mRNA, partial sequence. [AF274937]                                                            | 0.361030612 |                                                   |
| <b>C6orf211</b>        | Homo sapiens chromosome 6 open reading frame 211 (C6orf211), mRNA [NM_024573]                                      | 0.365046799 |                                                   |
| <b>AK056245</b>        | Homo sapiens cDNA FLJ31683 fis, clone NT2RI2005353. [AK056245]                                                     | 0.366099279 |                                                   |
| <b>PHKB</b>            | Homo sapiens phosphorylase kinase, beta (PHKB), transcript variant 1, mRNA [NM_000293]                             | 0.36678392  |                                                   |
| <b>BF509482</b>        | UI-H-BI4-a0z-b-08-0-UI.s1 NCI_CGAP_Sub8 Homo sapiens cDNA clone IMAGE:3086535 3', mRNA sequence [BF509482]         | 0.370735322 |                                                   |
| <b>AL832758</b>        | Homo sapiens mRNA; cDNA DKFZp686C0927 (from clone DKFZp686C0927). [AL832758]                                       | 0.371776581 |                                                   |
| <b>ENST00000373218</b> | Homo sapiens mRNA; cDNA DKFZp762K067 (from clone DKFZp762K067). [CR627373]                                         | 0.372494994 |                                                   |
| <b>PDE8A</b>           | Homo sapiens phosphodiesterase 8A (PDE8A), transcript variant 5, mRNA [NM_173457]                                  | 0.377251072 |                                                   |
| <b>FAM62B</b>          | Homo sapiens family with sequence similarity 62 (C2 domain containing) member B (FAM62B), mRNA [NM_020728]         | 0.378298525 |                                                   |
| <b>SCEL</b>            | Homo sapiens sciellin (SCEL), transcript variant 2, mRNA [NM_144777]                                               | 0.382019937 |                                                   |
| <b>NXT2</b>            | Homo sapiens nuclear transport factor 2-like export factor 2 (NXT2), mRNA [NM_018698]                              | 0.382153336 |                                                   |
| <b>ARHGEF3</b>         | Homo sapiens Rho guanine nucleotide exchange factor (GEF) 3 (ARHGEF3), mRNA [NM_019555]                            | 0.382355051 |                                                   |
| <b>THC2314901</b>      | BC004536 carnitine deficiency-associated gene expressed in ventricle 1 {Homo sapiens;} , partial (7%) [THC2314901] | 0.382570549 |                                                   |
| <b>AL133577</b>        | Homo sapiens mRNA; cDNA DKFZp434G0972 (from clone DKFZp434G0972). [AL133577]                                       | 0.383756041 |                                                   |
| <b>ENST00000367142</b> | Q62VJ0 (Q62VJ0) Small peptidoglycan-associated lipoprotein, partial (13%) [THC2301029]                             | 0.385407708 |                                                   |
| <b>DEPDC7</b>          | Homo sapiens DEP domain containing 7 (DEPDC7), mRNA [NM_139160]                                                    | 0.386647666 |                                                   |
| <b>ZNF426</b>          | Homo sapiens zinc finger protein 426 (ZNF426), mRNA [NM_024106]                                                    | 0.387439082 |                                                   |

|                        |                                                                                                                    |             |                                                                                        |
|------------------------|--------------------------------------------------------------------------------------------------------------------|-------------|----------------------------------------------------------------------------------------|
| <b>PCYOX1</b>          | Homo sapiens prenylcysteine oxidase 1 (PCYOX1), mRNA [NM_016297]                                                   | 0.387560426 |                                                                                        |
| <b>SFRP1</b>           | Homo sapiens secreted frizzled-related protein 1 (SFRP1), mRNA [NM_003012]                                         | 0.392834472 | It inhibits WNT-signaling (89). WNT is an inhibitor of sebaceous differentiation (90). |
| <b>GTF2I</b>           | Homo sapiens general transcription factor II, i (GTF2I), transcript variant 1, mRNA [NM_032999]                    | 0.394530829 |                                                                                        |
| <b>ADNP</b>            | Homo sapiens activity-dependent neuroprotector (ADNP), transcript variant 1, mRNA [NM_015339]                      | 0.399327536 |                                                                                        |
| <b>SVIL</b>            | Homo sapiens supervillin (SVIL), transcript variant 2, mRNA [NM_021738]                                            | 0.400968078 |                                                                                        |
| <b>BG163514</b>        | 602338531F1 NIH_MGC_89 Homo sapiens cDNA clone IMAGE:4446534 5', mRNA sequence [BG163514]                          | 0.403181706 |                                                                                        |
| <b>SLFN12</b>          | Homo sapiens schlafen family member 12 (SLFN12), mRNA [NM_018042]                                                  | 0.408594415 |                                                                                        |
| <b>UBE1C</b>           | Homo sapiens ubiquitin-activating enzyme E1C (UBA3 homolog, yeast) (UBE1C), transcript variant 1, mRNA [NM_003968] | 0.409550306 |                                                                                        |
| <b>CENPI</b>           | Homo sapiens centromere protein I (CENPI), mRNA [NM_006733]                                                        | 0.416365112 |                                                                                        |
| <b>FLJ22624</b>        | Homo sapiens FLJ22624 protein (FLJ22624), mRNA [NM_024808]                                                         | 0.41913823  |                                                                                        |
| <b>HMGN3</b>           | Homo sapiens high mobility group nucleosomal binding domain 3 (HMGN3), transcript variant 2, mRNA [NM_138730]      | 0.424725991 |                                                                                        |
| <b>BTBD1</b>           | Homo sapiens BTB (POZ) domain containing 1 (BTBD1), transcript variant 1, mRNA [NM_025238]                         | 0.42599776  |                                                                                        |
| <b>ENST00000367612</b> | Homo sapiens cDNA FLJ11174 fis, clone PLACE1007367. [AK002036]                                                     | 0.432484207 |                                                                                        |
| <b>FAM96A</b>          | Homo sapiens family with sequence similarity 96, member A (FAM96A), transcript variant 1, mRNA [NM_032231]         | 0.438190306 |                                                                                        |
| <b>ENST00000366751</b> | Homo sapiens mRNA full length insert cDNA clone EUROIMAGE 2068962. [AJ420589]                                      | 0.438266468 |                                                                                        |
| <b>FRK</b>             | Homo sapiens fyn-related kinase (FRK), mRNA [NM_002031]                                                            | 0.444706282 |                                                                                        |
| <b>NCOA7</b>           | Homo sapiens nuclear receptor coactivator 7 (NCOA7), mRNA [NM_181782]                                              | 0.445200315 |                                                                                        |
| <b>TCEAL1</b>          | Homo sapiens transcription elongation factor A (SII)-like 1 (TCEAL1), transcript variant 3, mRNA [NM_001006640]    | 0.447935262 |                                                                                        |
| <b>SERPINB9</b>        | Homo sapiens serpin peptidase inhibitor, clade B (ovalbumin), member 9 (SERPINB9), mRNA [NM_004155]                | 0.451637699 |                                                                                        |

|                          |                                                                                                     |             |                            |
|--------------------------|-----------------------------------------------------------------------------------------------------|-------------|----------------------------|
| <b><i>CCBE1</i></b>      | Homo sapiens collagen and calcium binding EGF domains 1 (CCBE1), mRNA [NM_133459]                   | 0.454814193 |                            |
| <b><i>RBM7</i></b>       | Homo sapiens RNA binding motif protein 7 (RBM7), mRNA [NM_016090]                                   | 0.462986923 |                            |
| <b><i>MKI67</i></b>      | Homo sapiens antigen identified by monoclonal antibody Ki-67 (MKI67), mRNA [NM_002417]              | 0.474182345 | Proliferation marker (91). |
| <b><i>THC2342537</i></b> | ALU1_HUMAN (P39188) Alu subfamily J sequence contamination warning entry, partial (5%) [THC2342537] | 0.475837891 |                            |
| <b><i>GPIAP1</i></b>     | Homo sapiens GPI-anchored membrane protein 1 (GPIAP1), transcript variant 2, mRNA [NM_203364]       | 0.490956422 |                            |
| <b><i>FLJ20273</i></b>   | Homo sapiens RNA-binding protein (FLJ20273), mRNA [NM_019027]                                       | 0.494577039 |                            |

**Supplemental Table 2.** List of genes that were significantly (3 independent treatments, at least 2-fold equi-directional changes in all cases,  $P < 0.05$ ) up-regulated by CBD treatment of human SZ95 sebocytes

| GeneName               | Description                                                                                                                                | Average Fold Change | Note                                                  |
|------------------------|--------------------------------------------------------------------------------------------------------------------------------------------|---------------------|-------------------------------------------------------|
| <b>LOC150383</b>       | Homo sapiens similar to RIKEN cDNA 2210021J22, transcript variant 1, mRNA (cDNA clone MGC:87534 IMAGE:30338205), complete cds. [BC067871]  | 2.023020498         |                                                       |
| <b>CICE</b>            | Homo sapiens cell death-inducing CIDE-like effector pseudogene (CICE) on chromosome 3 [NR_002786]                                          | 2.028682357         |                                                       |
| <b>LOC145853</b>       | PREDICTED: Homo sapiens hypothetical LOC145853 (LOC145853), mRNA [XM_096885]                                                               | 2.050746331         |                                                       |
| <b>THC2296299</b>      | Unknown                                                                                                                                    | 2.052834221         |                                                       |
| <b>AA532655</b>        | nj17d09.s1 NCI_CGAP_Pr22 Homo sapiens cDNA clone IMAGE:986609 3', mRNA sequence [AA532655]                                                 | 2.100324768         |                                                       |
| <b>SH2D5</b>           | Homo sapiens cDNA FLJ42879 fis, clone BRHIP3001283. [AK124869]                                                                             | 2.10832994          |                                                       |
| <b>CDH4</b>            | Homo sapiens cadherin 4, type 1, R-cadherin (retinal) (CDH4), mRNA [NM_001794]                                                             | 2.109778874         |                                                       |
| <b>ENST00000269290</b> | Homo sapiens HSPC254 mRNA, partial cds. [AF161372]                                                                                         | 2.114503823         |                                                       |
| <b>ATF4</b>            | Homo sapiens activating transcription factor 4 (tax-responsive enhancer element B67) (ATF4), transcript variant 1, mRNA [NM_001675]        | 2.138734073         | It is a down-stream molecule of TRIB3-signaling (66). |
| <b>GOT1</b>            | Homo sapiens glutamic-oxaloacetic transaminase 1, soluble (aspartate aminotransferase 1) (GOT1), mRNA [NM_002079]                          | 2.1476287           |                                                       |
| <b>C6orf1</b>          | Homo sapiens chromosome 6 open reading frame 1 (C6orf1), transcript variant 1, mRNA [NM_178508]                                            | 2.188775606         |                                                       |
| <b>SLC1A4</b>          | Homo sapiens solute carrier family 1 (glutamate/neutral amino acid transporter), member 4 (SLC1A4), mRNA [NM_003038]                       | 2.191168404         |                                                       |
| <b>ZNF598</b>          | Homo sapiens zinc finger protein 598 (ZNF598), mRNA [NM_178167]                                                                            | 2.221106279         |                                                       |
| <b>ABCB6</b>           | Homo sapiens ATP-binding cassette, sub-family B (MDR/TAP), member 6 (ABCB6), nuclear gene encoding mitochondrial protein, mRNA [NM_005689] | 2.238983054         |                                                       |
| <b>FUT1</b>            | Homo sapiens fucosyltransferase 1 (galactoside 2-alpha-L-fucosyltransferase, H blood group) (FUT1), mRNA [NM_000148]                       | 2.24477072          |                                                       |

|                     |                                                                                                                                                                                |             |                                                                      |
|---------------------|--------------------------------------------------------------------------------------------------------------------------------------------------------------------------------|-------------|----------------------------------------------------------------------|
| <b>ST6GALNAC4</b>   | Homo sapiens ST6 (alpha-N-acetyl-neuraminy-2,3-beta-galactosyl-1,3)-N-acetylgalactosaminide alpha-2,6-sialyltransferase 4 (ST6GALNAC4), transcript variant 1, mRNA [NM_175039] | 2.249856903 |                                                                      |
| <b>WARS</b>         | Homo sapiens tryptophanyl-tRNA synthetase (WARS), transcript variant 1, mRNA [NM_004184]                                                                                       | 2.262522437 |                                                                      |
| <b>MYBBP1A</b>      | Homo sapiens MYB binding protein (P160) 1a (MYBBP1A), mRNA [NM_014520]                                                                                                         | 2.285565522 | It is a repressor of NF-κB (92).                                     |
| <b>AK123450</b>     | Homo sapiens cDNA FLJ41456 fis, clone BRSTN2012320. [AK123450]                                                                                                                 | 2.291105966 |                                                                      |
| <b>LOC645427</b>    | Homo sapiens cDNA FLJ37088 fis, clone BRACE2017124. [AK094407]                                                                                                                 | 2.299131401 |                                                                      |
| <b>A_32_P146871</b> | Unknown                                                                                                                                                                        | 2.325869291 |                                                                      |
| <b>UBIAD1</b>       | Homo sapiens UbiA prenyltransferase domain containing 1 (UBIAD1), mRNA [NM_013319]                                                                                             | 2.326335569 |                                                                      |
| <b>TIGA1</b>        | Homo sapiens TIGA1 (TIGA1), mRNA [NM_053000]                                                                                                                                   | 2.332263761 | It inhibits proliferation via maintaining G <sub>0</sub> phase (93). |
| <b>NAGS</b>         | Homo sapiens N-acetylglutamate synthase (NAGS), mRNA [NM_153006]                                                                                                               | 2.354736066 |                                                                      |
| <b>SLC3A2</b>       | Homo sapiens solute carrier family 3 (activators of dibasic and neutral amino acid transport), member 2 (SLC3A2), transcript variant 3, mRNA [NM_002394]                       | 2.372841331 |                                                                      |
| <b>SARS</b>         | Homo sapiens seryl-tRNA synthetase (SARS), mRNA [NM_006513]                                                                                                                    | 2.3754084   |                                                                      |
| <b>ZFAND2A</b>      | Homo sapiens zinc finger, AN1-type domain 2A (ZFAND2A), mRNA [NM_182491]                                                                                                       | 2.395515359 |                                                                      |
| <b>AK129849</b>     | Homo sapiens cDNA FLJ26339 fis, clone HRT02975. [AK129849]                                                                                                                     | 2.396346358 |                                                                      |
| <b>PHGDH</b>        | Homo sapiens phosphoglycerate dehydrogenase (PHGDH), mRNA [NM_006623]                                                                                                          | 2.401009252 |                                                                      |
| <b>ETV4</b>         | Homo sapiens ets variant gene 4 (E1A enhancer binding protein, E1AF) (ETV4), mRNA [NM_001986]                                                                                  | 2.415031911 |                                                                      |
| <b>AW275876</b>     | xq40c08.x1 NCI_CGAP_Lu28 Homo sapiens cDNA clone IMAGE:2753102 3' similar to gb:X57352 INTERFERON-INDUCIBLE PROTEIN 1-8U (HUMAN);, mRNA sequence [AW275876]                    | 2.41597705  |                                                                      |
| <b>GPT2</b>         | Homo sapiens glutamic pyruvate transaminase (alanine aminotransferase) 2 (GPT2), mRNA [NM_133443]                                                                              | 2.418307046 |                                                                      |
| <b>LARP6</b>        | Homo sapiens La ribonucleoprotein domain family, member 6 (LARP6), transcript variant 1, mRNA [NM_018357]                                                                      | 2.424631034 |                                                                      |

|                     |                                                                                                                                                               |             |                                    |
|---------------------|---------------------------------------------------------------------------------------------------------------------------------------------------------------|-------------|------------------------------------|
| <b>THC2370432</b>   | AL547890 AL547890 Homo sapiens PLACENTA COT 25-NORMALIZED Homo sapiens cDNA clone CS0DI033YB09 5-PRIME, mRNA sequence [AL547890]                              | 2.436811494 |                                    |
| <b>A_24_P204414</b> | Unknown                                                                                                                                                       | 2.442940076 |                                    |
| <b>CHAC1</b>        | Homo sapiens ChaC, cation transport regulator-like 1 (E. coli) (CHAC1), mRNA [NM_024111]                                                                      | 2.449755082 | Down-stream of ATF4 (67).          |
| <b>BEX2</b>         | Homo sapiens brain expressed X-linked 2 (BEX2), mRNA [NM_032621]                                                                                              | 2.517811045 |                                    |
| <b>IGSF4B</b>       | Homo sapiens immunoglobulin superfamily, member 4B (IGSF4B), mRNA [NM_021189]                                                                                 | 2.535371171 |                                    |
| <b>SDSL</b>         | Homo sapiens serine dehydratase-like (SDSL), mRNA [NM_138432]                                                                                                 | 2.538715595 |                                    |
| <b>AK026372</b>     | Homo sapiens cDNA: FLJ22719 fis, clone HSI14307. [AK026372]                                                                                                   | 2.555616463 |                                    |
| <b>C3AR1</b>        | Homo sapiens complement component 3a receptor 1 (C3AR1), mRNA [NM_004054]                                                                                     | 2.570060685 |                                    |
| <b>HERPUD1</b>      | Homo sapiens homocysteine-inducible, endoplasmic reticulum stress-inducible, ubiquitin-like domain member 1 (HERPUD1), transcript variant 1, mRNA [NM_014685] | 2.571099986 |                                    |
| <b>BU733098</b>     | BU733098 UI-E-CI1-afo-h-12-0-UI.s1 UI-E-CI1 Homo sapiens cDNA clone UI-E-CI1-afo-h-12-0-UI 3', mRNA sequence [BU733098]                                       | 2.637830353 |                                    |
| <b>EXOSC5</b>       | Homo sapiens exosome component 5 (EXOSC5), mRNA [NM_020158]                                                                                                   | 2.692247637 |                                    |
| <b>KCNG1</b>        | Homo sapiens potassium voltage-gated channel, subfamily G, member 1 (KCNG1), transcript variant 2, mRNA [NM_172318]                                           | 2.703684623 |                                    |
| <b>SH2D2A</b>       | Homo sapiens SH2 domain protein 2A (SH2D2A), mRNA [NM_003975]                                                                                                 | 2.75980934  |                                    |
| <b>AL581249</b>     | AL581249 AL581249 Homo sapiens B CELLS (RAMOS CELL LINE) Homo sapiens cDNA clone CS0DG001YB03 3-PRIME, mRNA sequence [AL581249]                               | 2.775465209 |                                    |
| <b>THC2269172</b>   | Unknown                                                                                                                                                       | 2.927166352 |                                    |
| <b>HIST2H2AA3</b>   | Homo sapiens histone 2, H2aa3 (HIST2H2AA3), mRNA [NM_003516]                                                                                                  | 2.938759743 |                                    |
| <b>YARS</b>         | Homo sapiens tyrosyl-tRNA synthetase (YARS), mRNA [NM_003680]                                                                                                 | 2.94243008  |                                    |
| <b>THC2268341</b>   | HSU18930 MHC class I antigen HLA-A2 {Homo sapiens;} , partial (24%) [THC2268341]                                                                              | 2.965358743 |                                    |
| <b>SLC1A5</b>       | Homo sapiens solute carrier family 1 (neutral amino acid transporter), member 5 (SLC1A5), mRNA [NM_005628]                                                    | 2.99104015  |                                    |
| <b>CAMP</b>         | Homo sapiens cathelicidin antimicrobial peptide (CAMP), mRNA [NM_004345]                                                                                      | 3.005000572 | A key anti-microbial peptide (49). |

|                        |                                                                                                                                                              |             |                                                                                          |
|------------------------|--------------------------------------------------------------------------------------------------------------------------------------------------------------|-------------|------------------------------------------------------------------------------------------|
| <b>ARHGAP9</b>         | Homo sapiens Rho GTPase activating protein 9 (ARHGAP9), mRNA [NM_032496]                                                                                     | 3.051559194 | It inhibits ERK2 (46).                                                                   |
| <b>RHEBL1</b>          | Homo sapiens Ras homolog enriched in brain like 1 (RHEBL1), mRNA [NM_144593]                                                                                 | 3.093509903 |                                                                                          |
| <b>ENST00000377492</b> | Homo sapiens cDNA clone IMAGE:4826036, containing frame-shift errors. [BC032035]                                                                             | 3.132671285 |                                                                                          |
| <b>CTH</b>             | Homo sapiens cystathionase (cystathionine gamma-lyase) (CTH), transcript variant 1, mRNA [NM_001902]                                                         | 3.14257467  |                                                                                          |
| <b>BF689038</b>        | BF689038 602185294T1 NIH_MGC_43 Homo sapiens cDNA clone IMAGE:4299791 3', mRNA sequence [BF689038]                                                           | 3.20570321  |                                                                                          |
| <b>ASNS</b>            | Homo sapiens asparagine synthetase (ASNS), transcript variant 2, mRNA [NM_001673]                                                                            | 3.286716977 | It is a down-stream target of TRIB3-ATF4 axis (66).                                      |
| <b>SLC5A12</b>         | Homo sapiens solute carrier family 5 (sodium/glucose cotransporter), member 12 (SLC5A12), transcript variant 2, mRNA [NM_178498]                             | 3.304062131 |                                                                                          |
| <b>THC2375394</b>      | Unknown                                                                                                                                                      | 3.3240169   |                                                                                          |
| <b>TRIB3</b>           | Homo sapiens tribbles homolog 3 (Drosophila) (TRIB3), mRNA [NM_021158]                                                                                       | 3.393634165 | Negative regulator of NF- $\kappa$ B (50), it suppresses adipocyte differentiation (63). |
| <b>LOC645733</b>       | PREDICTED: Homo sapiens hypothetical LOC389025 (LOC389025), mRNA [XM_374004]                                                                                 | 3.397325086 |                                                                                          |
| <b>IL29</b>            | Homo sapiens interleukin 29 (interferon, lambda 1) (IL29), mRNA [NM_172140]                                                                                  | 3.503097918 |                                                                                          |
| <b>EFCBP2</b>          | Homo sapiens EF-hand calcium binding protein 2 (EFCBP2), mRNA [NM_019065]                                                                                    | 3.509125629 |                                                                                          |
| <b>GDF15</b>           | Homo sapiens growth differentiation factor 15 (GDF15), mRNA [NM_004864]                                                                                      | 3.593744623 | GDF15 overexpressing mice are lean and show reduced inflammatory responses (94).         |
| <b>KCTD15</b>          | Homo sapiens potassium channel tetramerisation domain containing 15 (KCTD15), mRNA [NM_024076]                                                               | 3.651733545 |                                                                                          |
| <b>THC2340759</b>      | Unknown                                                                                                                                                      | 3.871258178 |                                                                                          |
| <b>PCK2</b>            | Homo sapiens phosphoenolpyruvate carboxykinase 2 (mitochondrial) (PCK2), nuclear gene encoding mitochondrial protein, transcript variant 1, mRNA [NM_004563] | 3.88005262  |                                                                                          |
| <b>STC2</b>            | Homo sapiens stanniocalcin 2 (STC2), mRNA [NM_003714]                                                                                                        | 3.951302081 |                                                                                          |
| <b>DDIT3</b>           | Homo sapiens DNA-damage-inducible transcript 3 (DDIT3), mRNA [NM_004083]                                                                                     | 6.59893248  | It is a down-stream target of TRIB3-ATF4 axis (66).                                      |

|                          |                                                                                                                                                           |             |  |
|--------------------------|-----------------------------------------------------------------------------------------------------------------------------------------------------------|-------------|--|
| <b><i>THC2363646</i></b> | AJHYNG asparagine synthase<br>(glutamine-hydrolysing)<br>[similarity] - golden hamster<br>{ <i>Mesocricetus auratus</i> ;}, partial (17%)<br>[THC2363646] | 7.040593326 |  |
|--------------------------|-----------------------------------------------------------------------------------------------------------------------------------------------------------|-------------|--|

### 3. Supplemental Figures

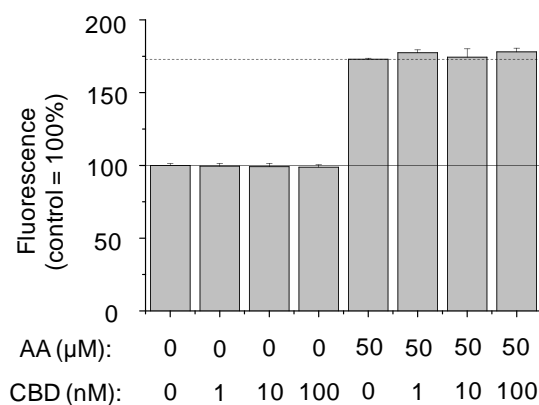

**Supplemental Figure 1.** *Low concentrations of CBD exert no effect on either basal or AA-induced lipid synthesis of human sebocytes*

Neutral lipid synthesis (Nile Red staining). Cells were treated by arachidonic acid (AA) and/or cannabidiol (CBD) for 48 hrs. Data are expressed as mean $\pm$ SEM of four independent determinations as the percentage of the vehicle control (100%, solid line). One additional experiment yielded similar results.

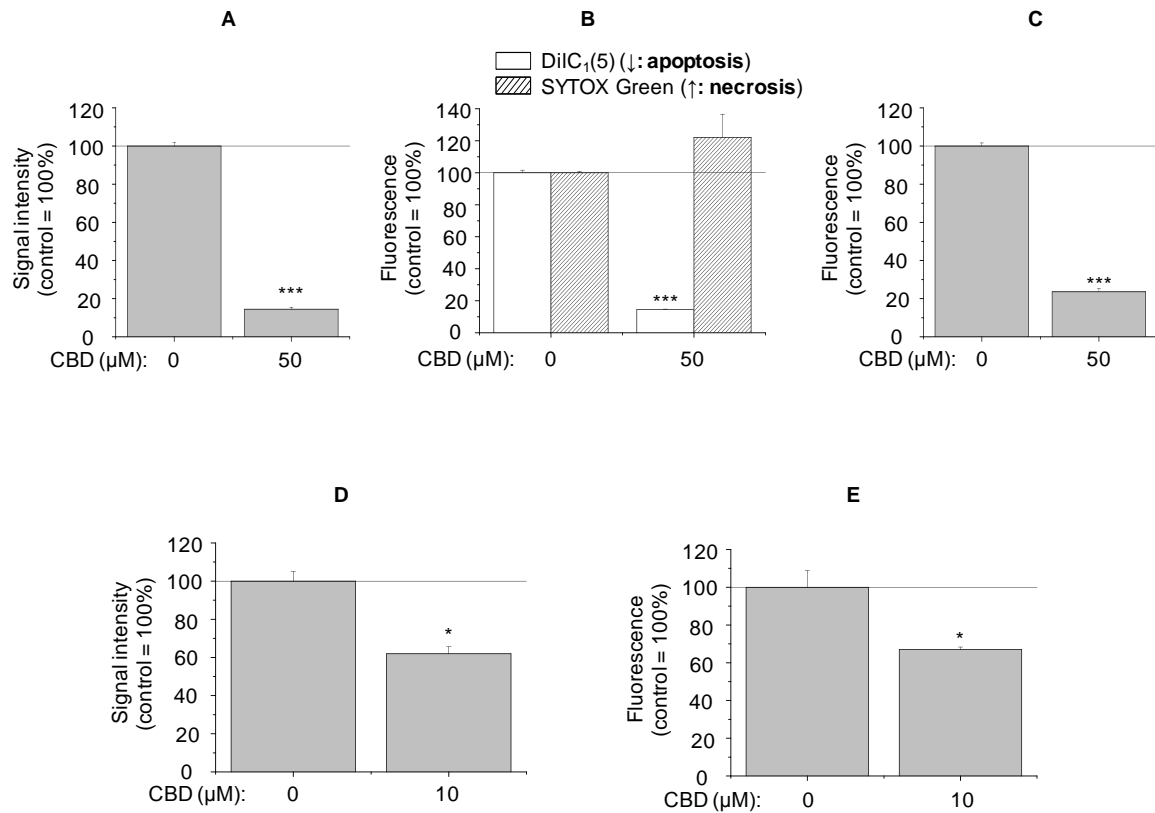

**Supplemental Figure 2. High concentrations or long-term applications of CBD decrease human sebocyte viability and lipid production**

(A) MTT-assay. Viability of sebocytes following 48-hr treatments. CBD: cannabidiol. \*\*\* $P < 0.001$ . (B) Cell death (DilC<sub>1</sub>(5)-SYTOX Green double labeling) assays (after 24-hr treatments). (C) Neutral lipid synthesis (Nile Red staining). Cells were treated by CBD for 48 hrs. \*\*\* $P < 0.001$ . (D) MTT-assay. Viability of sebocytes following 6-day treatments. \* $P < 0.05$ . (E) Neutral lipid synthesis (Nile Red staining). Cells were treated by CBD for 6 days. \* $P < 0.05$ . (A, B, C, D, E) Results are expressed in the percentage of the vehicle control (100%, solid line) as mean $\pm$ SEM of four independent determinations. One additional experiment yielded similar results.

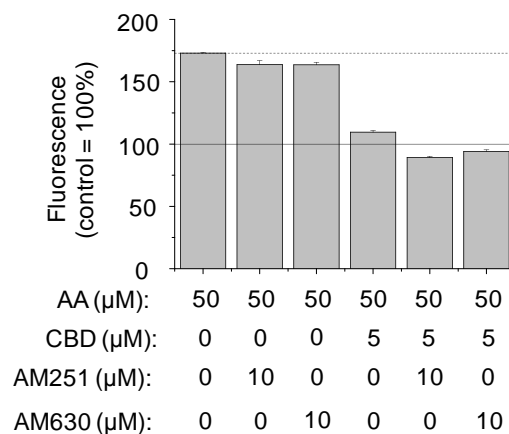

**Supplemental Figure 3. Effects of CBD are not mediated by CB1 or CB2 receptors**

Neutral lipid synthesis (Nile Red staining). Cells were treated with arachidonic acid (AA), cannabidiol (CBD), AM251 (CB1 receptor antagonist), AM630 (CB2 receptor antagonist) or combinations for 24 hrs. Data are expressed as mean±SEM of four independent determinations as the percentage of the vehicle control (100%, solid line). One additional experiment yielded similar results.

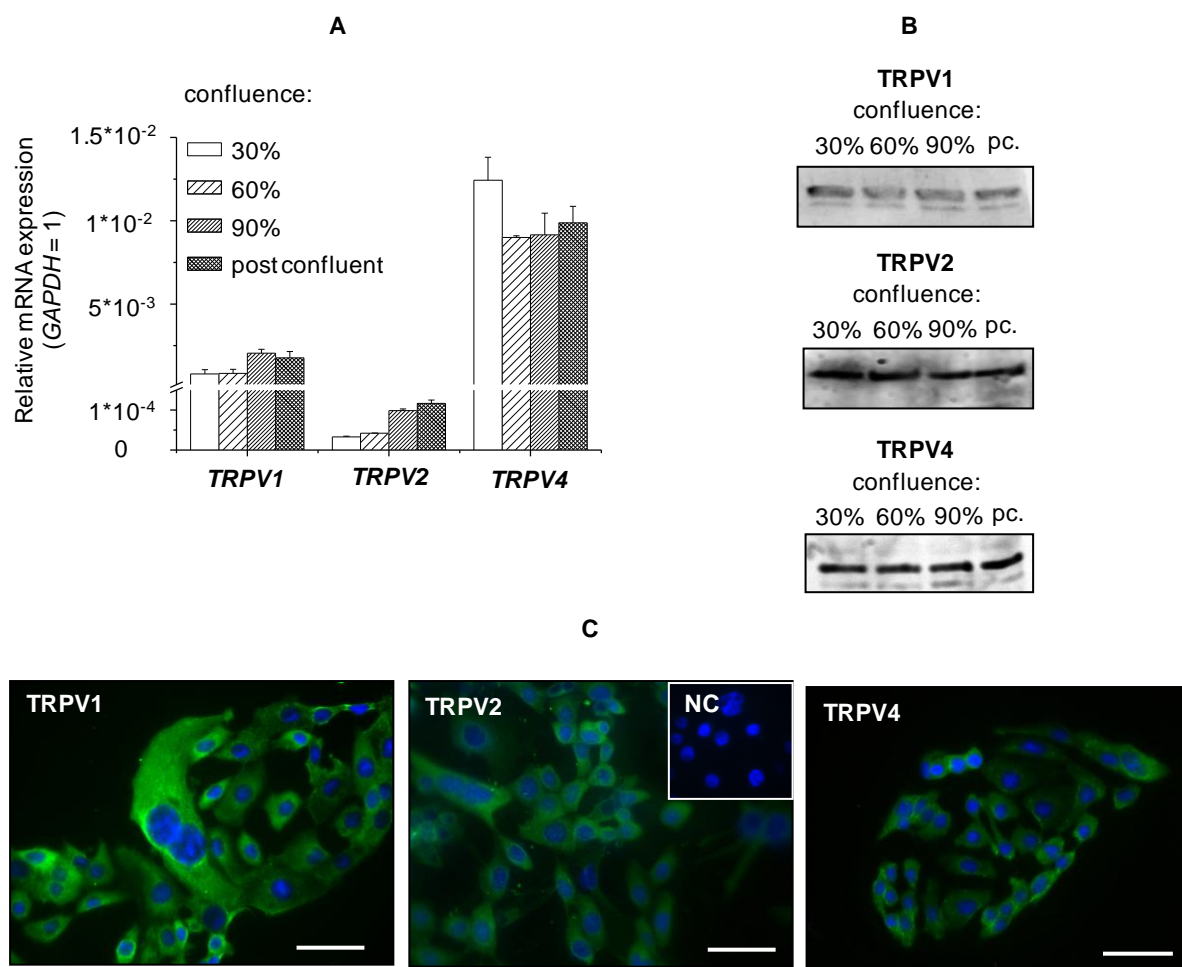

**Supplemental Figure 4.** Human SZ95 sebocytes express certain TRP channels

(A) Quantitative “real time” PCR on SZ95 sebocyte samples harvested at different confluences. Data of *TRPV1*, *TRPV2* and *TRPV4* mRNA expressions were normalized to the level of glyceraldehyde-3-phosphate dehydrogenase (*GAPDH*) of the same sample, and are expressed as mean±SEM of three independent determinations. Two additional experiments yielded similar results. (B) Western blot analysis of lysates of SZ95 sebocytes (pc: post-confluent culture). (C) Immunocytochemistry. TRPV1, TRPV2 and TRPV4-specific immunoreactivity was determined by immunofluorescence labeling (Alexa-Fluor®-488, green fluorescence) in SZ95 sebocytes. Nuclei were counterstained by DAPI (blue fluorescence). NC: negative control. Scale bars: 20 μm.

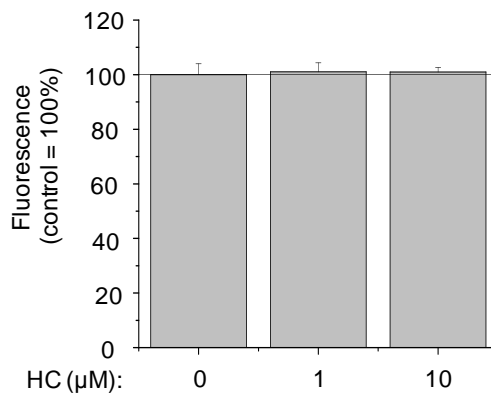

**Supplemental Figure 5.** *Antagonism of TRPV4 exerts no effect on basal lipid synthesis of human sebocytes*

Neutral lipid synthesis (Nile Red staining). Cells were treated with HC067047 (HC) for 48 hrs. Data are expressed as mean $\pm$ SEM of four independent determinations as the percentage of the vehicle control (100%, solid line). One additional experiment yielded similar results.

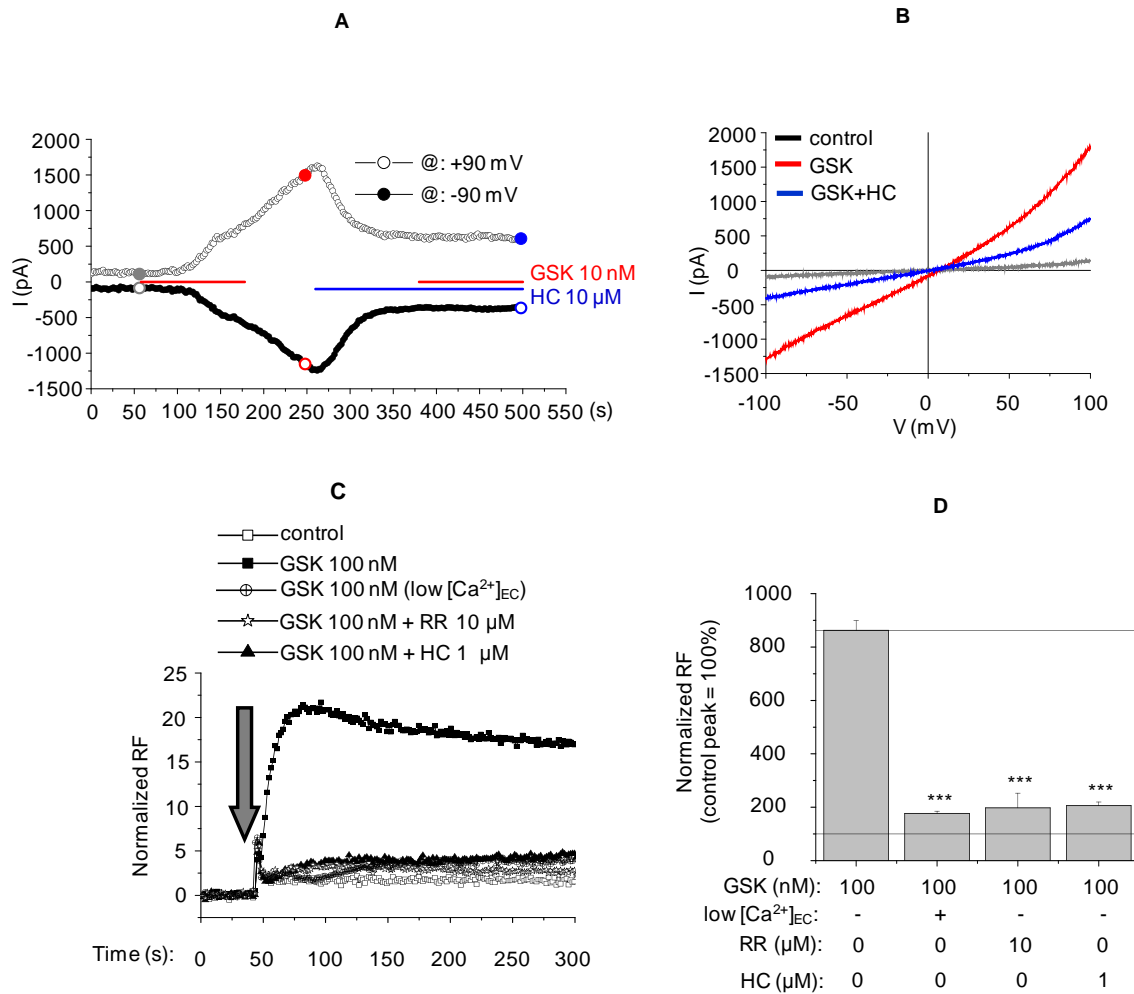

**Supplemental Figure 6.** *TRPV4 is functionally expressed by human sebocytes*

(A) Time course of whole current at -90 and +90 mV in SZ95 sebocytes treated by 10 nM GSK1016790A (GSK) and 10  $\mu$ M HC067047 (HC), as indicated in the figure. (B) Current-voltage traces at different time points as indicated in panel A. (C) Fluorescent  $\text{Ca}^{2+}$ -imaging. Compounds were applied as indicated by the arrow. Fluorescence (measured in relative fluorescence units, RF) was normalized to the baseline. GSK: GSK1016790A, HC: HC067047, RR: ruthenium red, low  $[\text{Ca}^{2+}]_{\text{EC}}$ : nominally  $\text{Ca}^{2+}$ -free Hank's solution. (D) Statistical analysis of the  $\text{Ca}^{2+}$ -imaging data shown in panel C. Measured peak values were expressed in the percentage of the peak value of the control (100%, solid line) as mean  $\pm$  SEM of 3 independent determinations. Two additional experiments yielded similar results. \*\*\*  $P < 0.001$  compared to the GSK-treated group.

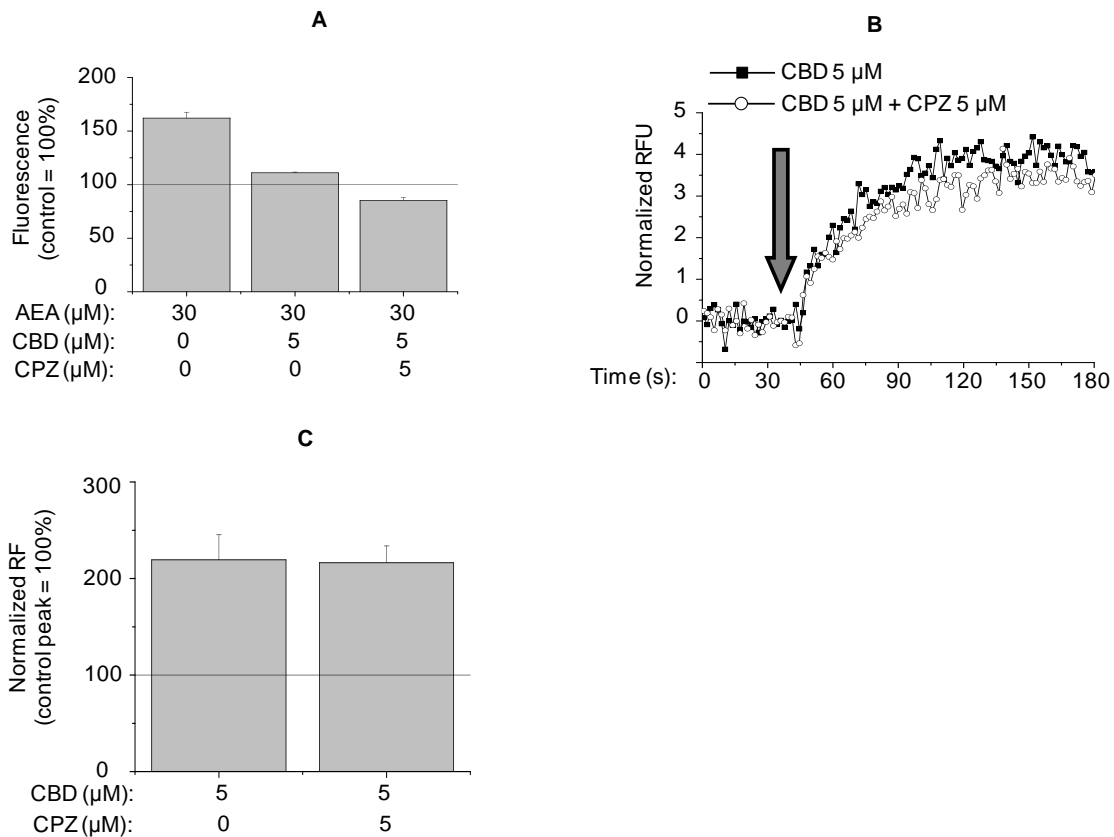

**Supplemental Figure 7. Effects of CBD on human sebocytes are not mediated by TRPV1**

(A) Neutral lipid synthesis (Nile Red staining). Cells were treated by anandamide (AEA), cannabidiol (CBD), capsazepine (CPZ), or combination for 24 hrs. Data are expressed as mean $\pm$ SEM of four independent determinations as the percentage of the vehicle control (100%, solid line). Two additional experiments yielded similar results. (B) Fluorescent Ca<sup>2+</sup>-imaging. Compounds were applied as indicated by the arrow. Fluorescence (measured in relative fluorescence units, RF) was normalized to the baseline (100%). (C) Statistical analysis of the Ca<sup>2+</sup>-imaging data. Measured peak values were expressed in the percentage of the peak value of the control (100%, solid line) as mean $\pm$ SEM of 3 independent determinations. Two additional experiments yielded similar results.

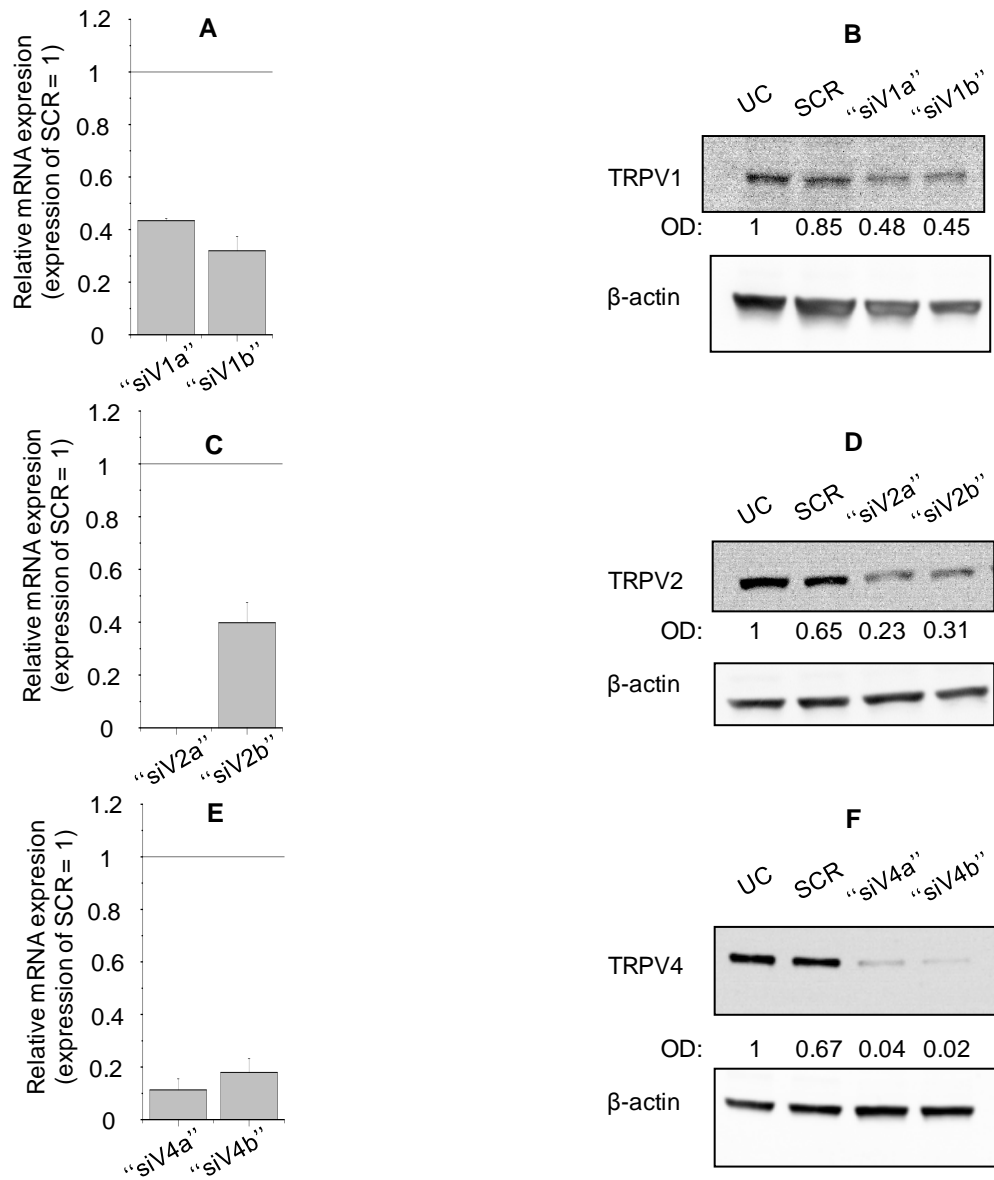

**Supplemental Figure 8.** Evaluation of efficacy of selective gene silencing of TRPV channels

(A, C and E) *TRPV1*, *TRPV2* and *TRPV4* mRNA expressions two days after their selective gene silencing. Data are presented by using  $\Delta\Delta CT$  method regarding glyceraldehyde-3-phosphate dehydrogenase (*GAPDH*) or peptidyl-prolyl isomerase A (*PPIA*) normalized TRPV mRNA expression of the appropriate scrambled (SCR) control as 1 (solid line). Data are expressed as mean $\pm$ SD of three independent determinations. (B, D and F) Western blot analyses of lysates of un-transfected (UC), non-sense RNA transfected (SCR: scrambled control), and TRPV1-, TRPV2- and TRPV4-silenced SZ95 sebocytes, respectively, three days after the transfection. OD:  $\beta$ -actin-normalized optical density of the corresponding bands. "siV1a", "siV1b", "siV2a", "siV2b", "siV4a" and "siV4b" mark different siRNA constructs against TRPV1, TRPV2 and TRPV4, respectively.

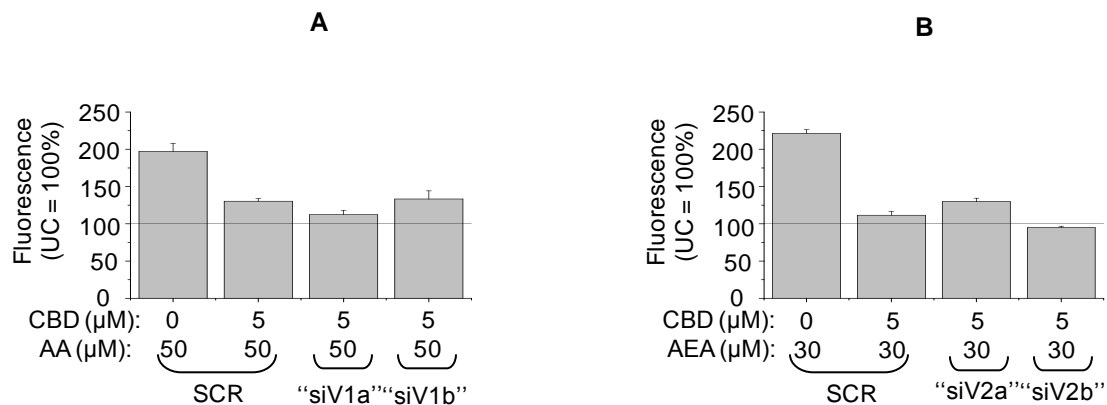

**Supplemental Figure 9.** *Neither TRPV1, nor TRPV2 mediates the lipostatic effects of CBD*

(**A** and **B**) Neutral lipid synthesis (Nile Red staining) following selective gene silencing of TRPV1 (**A**) or TRPV2 (**B**) channels (24-hr treatments, started at day 3 after transfection). Data are expressed as mean $\pm$ SEM of four independent determinations as the percentage of the untransfected vehicle control (100%, solid line). Two additional experiments yielded similar results. SCR: scrambled control. In panel **A** “siV1a” and “siV1b” mark different siRNA constructs against TRPV1, whereas in panel **B** “siV2a” and “siV2b” mark two different siRNA constructs against TRPV2. AA: arachidonic acid, AEA: anandamide, UC: untransfected vehicle control.

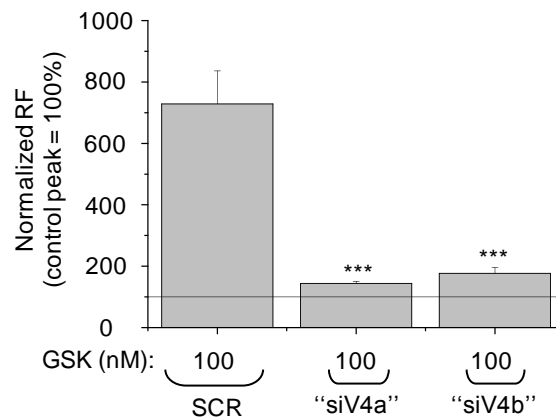

**Supplemental Figure 10.** *Silencing of TRPV4 effectively abrogates its functionality*

Statistical analysis of fluorescent  $\text{Ca}^{2+}$ -imaging data, obtained after GSK1016790A (GSK) challenges on TRPV4 "silenced" SZ95 sebocytes. Measured peak values were expressed in the percentage of the peak value of the control (100%, solid line) as mean $\pm$ SEM of 8 independent determinations. One additional experiment yielded similar results. "siV4a" and "siV4b" mark two different siRNA constructs against TRPV4. \*\*\* $P < 0.001$ .

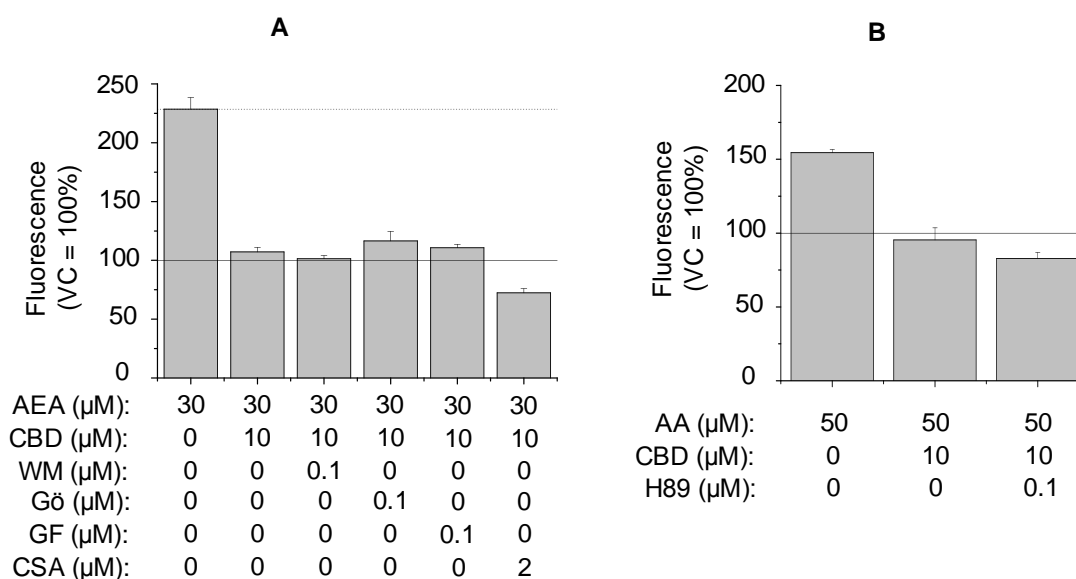

**Supplemental Figure 11.** *Lipostatic effect of CBD is not mediated by activation of PKC, PI3K, calcineurin (PP2B) or PKA*

Neutral lipid synthesis (Nile Red staining; 24-hr treatments) following various inhibitor treatments in combination with anandamide (**A**) or arachidonic acid (**B**). Data are expressed as mean $\pm$ SEM of four independent determinations as the percentage of the vehicle control (100%, solid line). One additional experiment yielded similar results. AA: arachidonic acid, AEA: anandamide, CBD: cannabidiol, CSA: Cyclosporine A (inhibitor of calcineurin), GF: GF109203X (inhibitor of the conventional and novel PKC isoforms), Gö: Gö6976 (inhibitor of the conventional PKC isoforms), H89 (inhibitor of PKA), PKA: protein kinase A, PKC: protein kinase C, PI3K: phosphatidylinositol-3-kinase, PP2B: protein phosphatase 2B, WM: wortmannin (inhibitor of phosphatidylinositol-3-kinase).

**Supplemental Figure 12.** *Hierarchy of down-regulated Biological Networks Gene Ontology (BiNGO) terms following CBD treatment (10  $\mu$ M, 24 hrs). Size of the nodes is proportional to the number of the identified genes of the corresponding GO term, whereas color of each node correlates to the adjusted P-value of the GO term (bigger size and more yellow color indicate higher number and significance, respectively)*

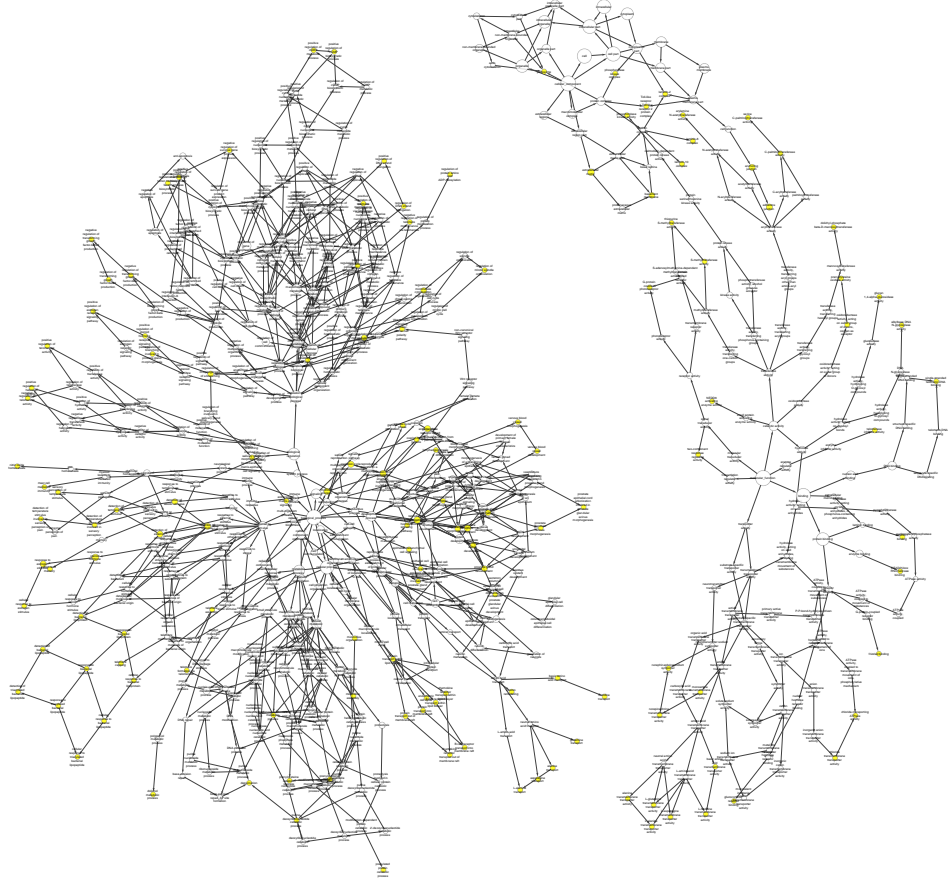

**Supplemental Figure 13.** *Hierarchy of up-regulated Biological Networks Gene Ontology terms following CBD treatment (10  $\mu$ M, 24 hrs). Size of the nodes is proportional to the number of the identified genes of the corresponding GO term, whereas color of each node correlates to the adjusted P-value of the GO term (bigger size and more yellow color indicate higher number and significance, respectively)*

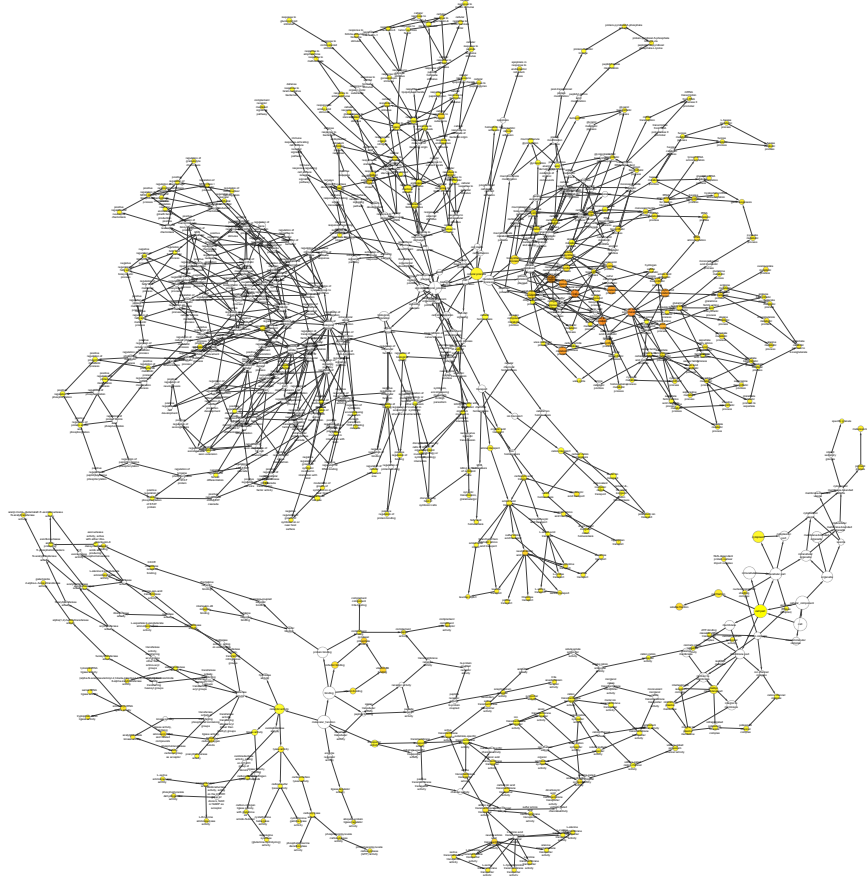

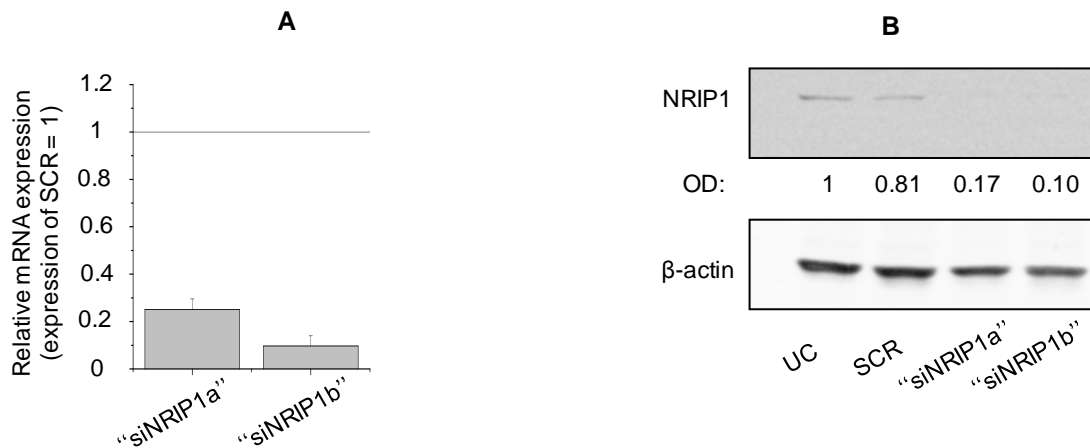

**Supplemental Figure 14.** *Evaluation of efficacy of selective gene silencing of NRIP1*

(A) *NRIP1* mRNA expression two days after selective gene silencing. Data are presented by using  $\Delta\Delta CT$  method regarding peptidyl-prolyl isomerase A (*PPIA*) normalized *NRIP1* mRNA expression of the scrambled (SCR) control as 1 (solid line). Data are expressed as mean $\pm$ SD of three independent determinations. (B) Western blot analysis of lysates of untransfected (UC), non-sense RNA transfected (SCR: scrambled control), and NRIP1-silenced SZ95 sebocytes three days after the transfection. OD:  $\beta$ -actin-normalized optical density of the corresponding bands. "siNRIP1a" and "siNRIP1b" mark two different constructs against NRIP1. NRIP1: nuclear receptor interacting protein-1.

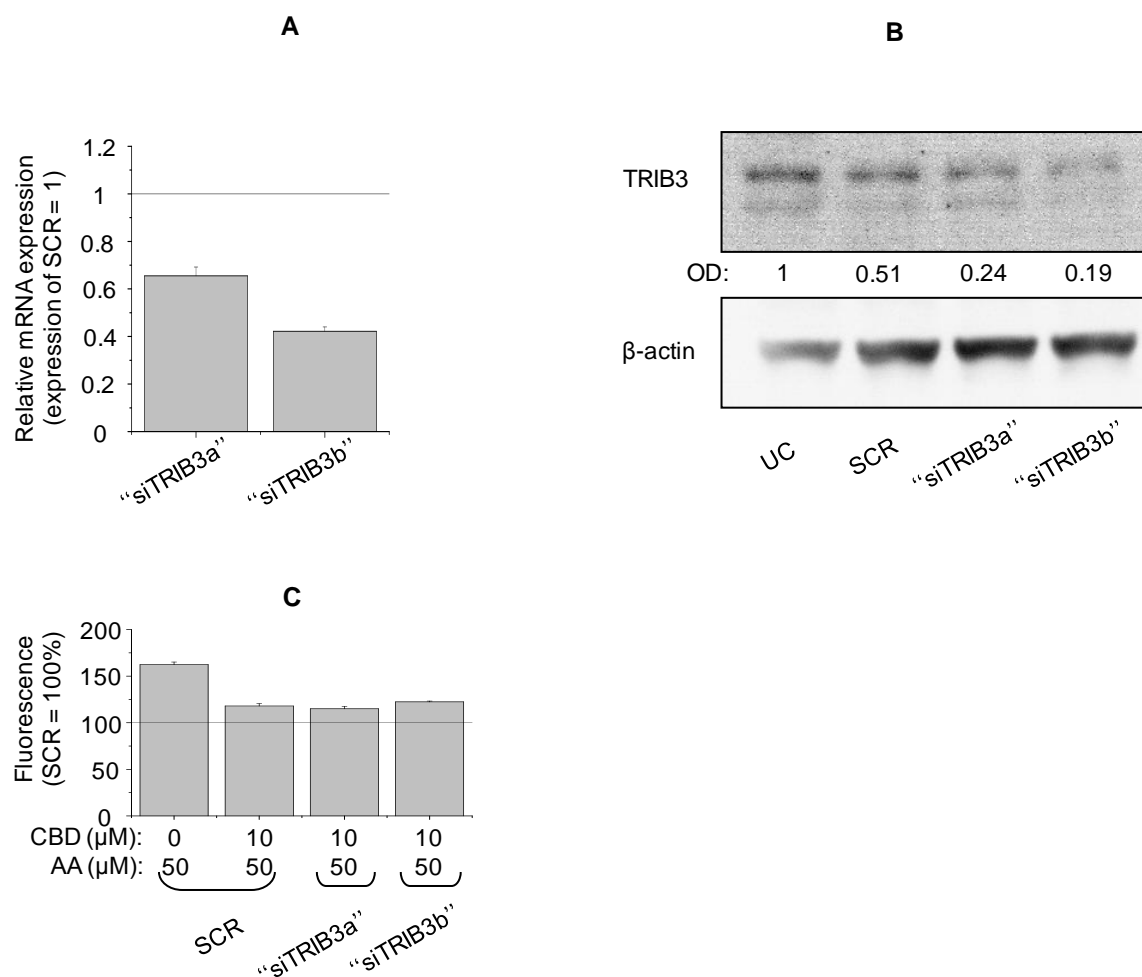

**Supplemental Figure 15. Evaluation of efficacy of selective gene silencing of *TRIB3***

(A) *TRIB3* mRNA expression two days after selective gene silencing. Data are presented by using  $\Delta\Delta CT$  method regarding peptidyl-prolyl isomerase A (*PPIA*) normalized *TRIB3* mRNA expression of the scrambled (SCR) control as 1 (solid line). Data are expressed as mean $\pm$ SD of three independent determinations. (B) Western blot analysis of lysates of untransfected (UC), non-sense RNA transfected (SCR: scrambled control), and *TRIB3*-silenced SZ95 sebocytes two days after the transfection. OD:  $\beta$ -actin-normalized optical density of the corresponding bands. (C) Neutral lipid synthesis (Nile Red staining) following various treatments. Data are expressed as mean $\pm$ SEM of four independent determinations as the percentage of the SCR vehicle control (100%, solid line). One additional experiment yielded similar results. "siTRIB3a" and "siTRIB3b" mark two different constructs against *TRIB3*. AA: arachidonic acid, CBD: cannabidiol, *TRIB3*: tribbles homolog 3.

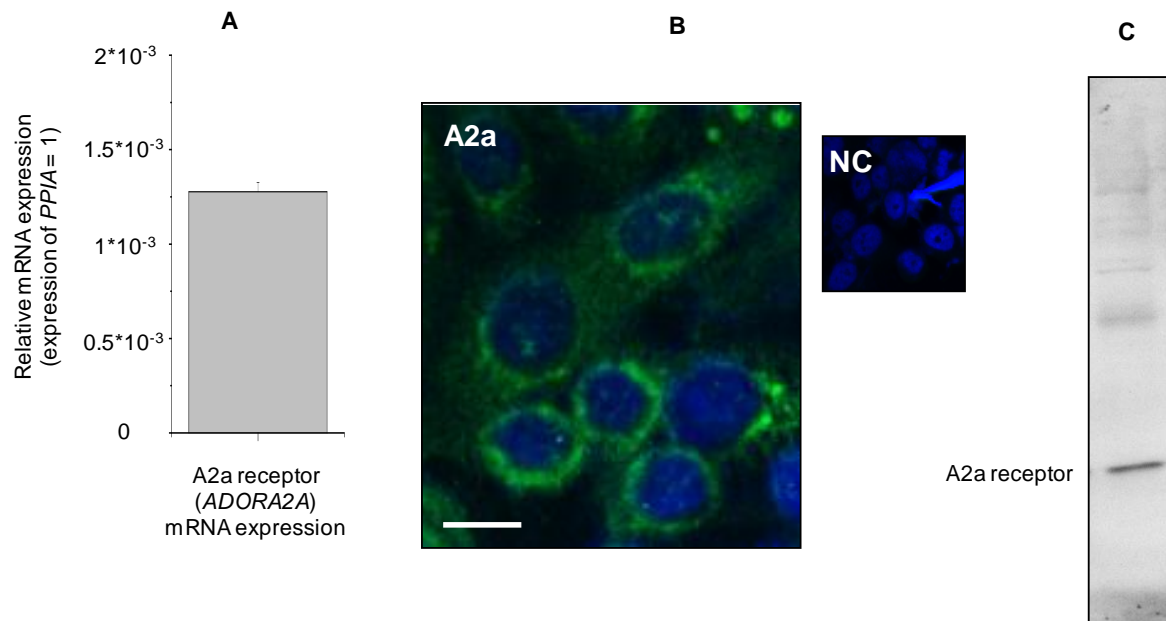

**Supplemental Figure 16.** *Human SZ95 sebocytes express adenosine A2a receptor*

**(A)** Quantitative “real time” PCR on SZ95 sebocyte samples harvested at 60% confluence. Data of A2a receptor (*ADORA2A*) mRNA expression was normalized to the level of *PPIA* of the same sample, and is expressed as mean±SD of three independent determinations. Two additional experiments yielded similar results. **(B)** Immunocytochemistry. A2a-specific immunoreactivity was determined by immunofluorescence labeling (Alexa-Fluor®-488, green fluorescence) in SZ95 sebocytes. Nuclei were counterstained with DAPI (blue fluorescence). NC: negative control. Scale bar: 10 µm. **(C)** Western blot analysis of lysate of SZ95 sebocytes (~60% confluence culture).

## 5. Supplemental references

81. Juknat A, Rimmerman N, Levy R, et al. Cannabidiol affects the expression of genes involved in zinc homeostasis in BV-2 microglial cells. *Neurochem Int.* 2012;61(6):923-30.
82. Entrez Gene: <http://www.ncbi.nlm.nih.gov/gene/23002>  
Accessed: July 5, 2013.
83. Hu Y, Ylivinkka I, Chen P, Li L, et al. Netrin-4 promotes glioblastoma cell proliferation through integrin  $\beta 4$  signaling. *Neoplasia.* 2012;14(3):219-27.
84. Entrez Gene: <http://www.ncbi.nlm.nih.gov/gene/79689>  
Accessed: July 5, 2013.
85. Varley CL, Bacon EJ, Holder JC, Southgate J. FOXA1 and IRF-1 intermediary transcriptional regulators of PPARgamma-induced urothelial cytodifferentiation. *Cell Death Differ.* 2009;16(1):103-114.
86. Entrez Gene: <http://www.ncbi.nlm.nih.gov/gene/7096>  
Accessed: July 5, 2013.
87. Schriever SC, Deutsch MJ, Adamski J, et al. Cellular signaling of amino acids towards mTORC1 activation in impaired human leucine catabolism. *J Nutr Biochem.* 2013;24(5):824-31.
88. Yang Y, Tarapore RS, Jarmel MH, et al. p53 mutation alters the effect of the esophageal tumor suppressor KLF5 on keratinocyte proliferation. *Cell Cycle.* 2012;11(21):4033-4039.
89. Rattner A, Hsieh JC, Smallwood PM, et al. A family of secreted proteins contains homology to the cysteine-rich ligand-binding domain of frizzled receptors. *Proc Natl Acad Sci U S A.* 1997;94(7):2859-2863.
90. Guha U, Mecklenburg L, Cowin P, et al. Bone morphogenetic protein signaling regulates postnatal hair follicle differentiation and cycling. *Am J Pathol.* 2004;165:729–740.
91. Entrez Gene: <http://www.ncbi.nlm.nih.gov/gene/4288>  
Accessed: July 5, 2013.
92. Owen HR, Elser M, Cheung E, et al. MYBBP1a is a novel repressor of NF-kappaB. *J Mol Biol.* 2007;366(3):725-36.
93. Yabuta N, Onda H, Watanabe M, et al. Isolation and characterization of the TIGA genes, whose transcripts are induced by growth arrest. *Nucleic Acids Res.* 2006;34(17):4878-92.

- 94.** Kim JM, Kosak JP, Kim JK, et al. NAG-1/GDF15 Transgenic Mouse Has Less White Adipose Tissue and a Reduced Inflammatory Response. *Mediators Inflamm.* 2013;2013:641851.
